# Supplementary material for: Targeting FAPα-expressing hepatic stellate cells overcomes resistance to antiangiogenics in colorectal cancer liver metastasis models
Source: PubMed Central journal article supplement (PMC9525122; doi:10.1172/jci157399), 2022-10-03

Supplemental Materials for

**Targeting FAP $\alpha$ -expressing hepatic stellate cells overcomes resistance to anti-angiogenics in colorectal cancer liver metastasis models**

Ming Qi<sup>#</sup>, Shuran Fan<sup>#</sup>, Maohua Huang<sup>#</sup>, Jinghua Pan, Yong Li, Qun Miao, Wenyu Lyu, Xiaobo Li, Lijuan Deng, Shenghui Qiu, Tongzheng Liu, Weiqing Deng, Xiaodong Chu, Chang Jiang, Wenzhuo He, Liangping Xia, Yunlong Yang, Jian Hong, Qi Qi, Wenqian Yin, Xiangning Liu, Changzheng Shi, Minfeng Chen\*, Wencai Ye\*, Dongmei Zhang\*

<sup>#</sup>These authors contributed equally to this work.

\*Corresponding author

Dr. Dongmei Zhang, College of Pharmacy, Jinan University, 601 West Huangpu Avenue, Guangzhou, 510632, P. R. China. Phone: 86.208.522.2653; E-mail: dmzhang701@jnu.edu.cn.

Dr. Wencai Ye, College of Pharmacy, Jinan University, 601 West Huangpu Avenue, Guangzhou, 510632, P. R. China. Phone: 86.208.522.0004; E-mail: chywc@aliyun.com.

Dr. Minfeng Chen, College of Pharmacy, Jinan University, 601 West Huangpu Avenue, Guangzhou, 510632, P. R. China. Phone: 86.208.522.8916; E-mail: minfengchen@jnu.edu.cn.

**This PDF file includes:**

Supplemental Figure 1 to 16

Supplemental Table 1 to 10

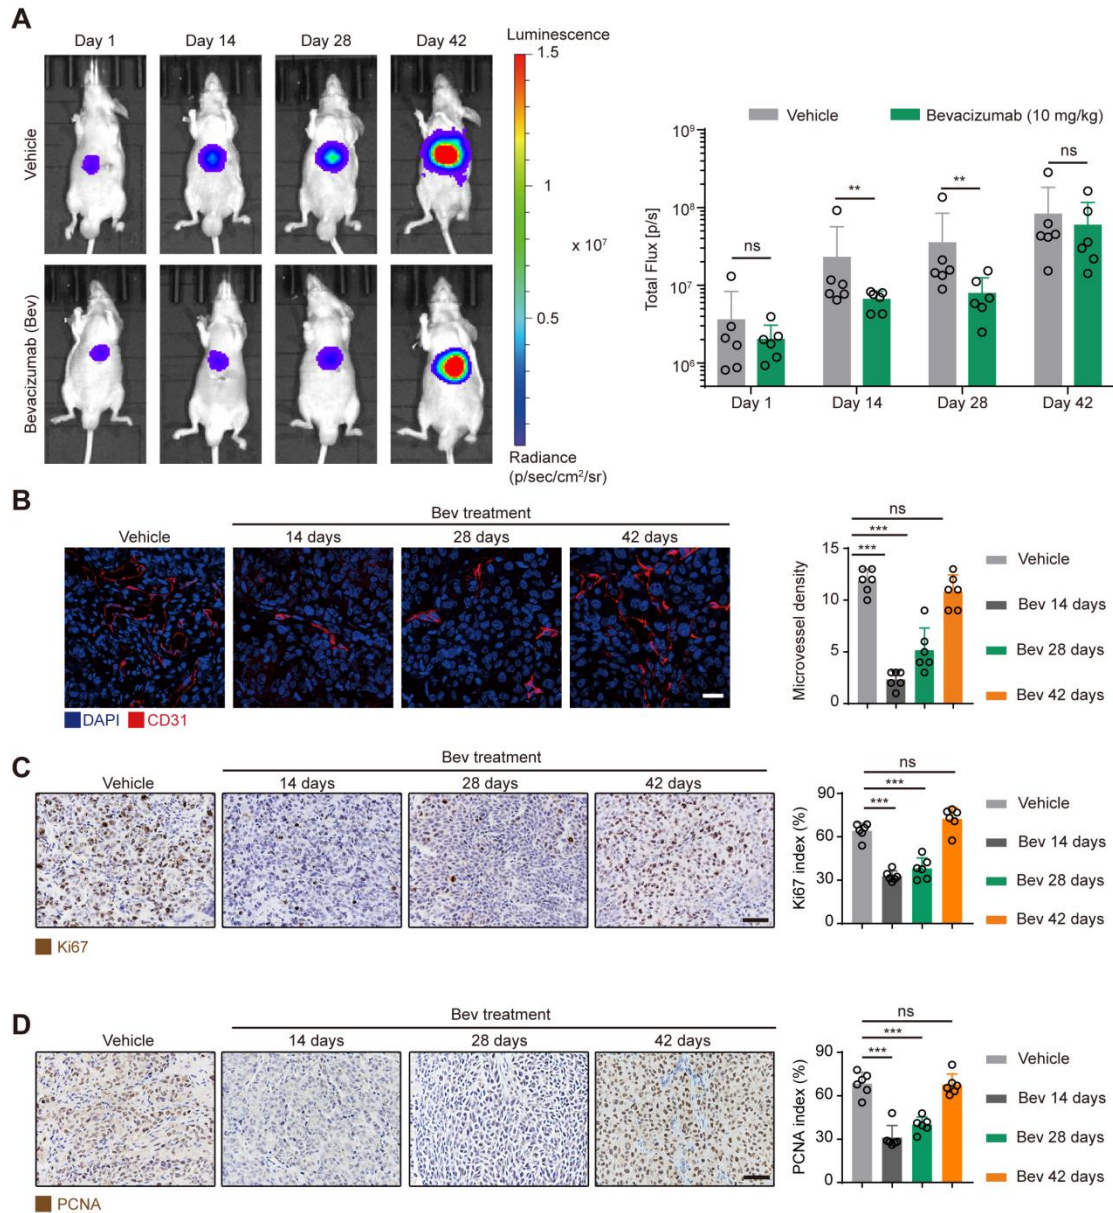

**Supplemental Figure 1. Construction of the bevacizumab acquired resistant HCT116 CRCLM xenografts.** (A) Representative images and quantification of bioluminescence signals in mice injected with HCT116-luc cells into the left main lobe of the liver ( $n = 6$ ). (B) Immunofluorescence staining and quantification of CD31<sup>+</sup> (red) tumor vessels ( $n = 6$ ). Scale bar, 20  $\mu\text{m}$ . (C) Immunohistochemical staining and quantification of Ki67 in tumor tissues ( $n = 6$ ). Scale bar, 50  $\mu\text{m}$ . (D) Immunohistochemical staining and quantification of PCNA in tumor tissues ( $n = 6$ ).

Scale bar, 50  $\mu\text{m}$ . Data are presented as mean  $\pm$  SEM. ns, no significance;  $**P < 0.01$ ,  $***P < 0.001$  (2-tailed unpaired  $t$  test in A; 1-way ANOVA with Tukey's post hoc comparison in B-D).

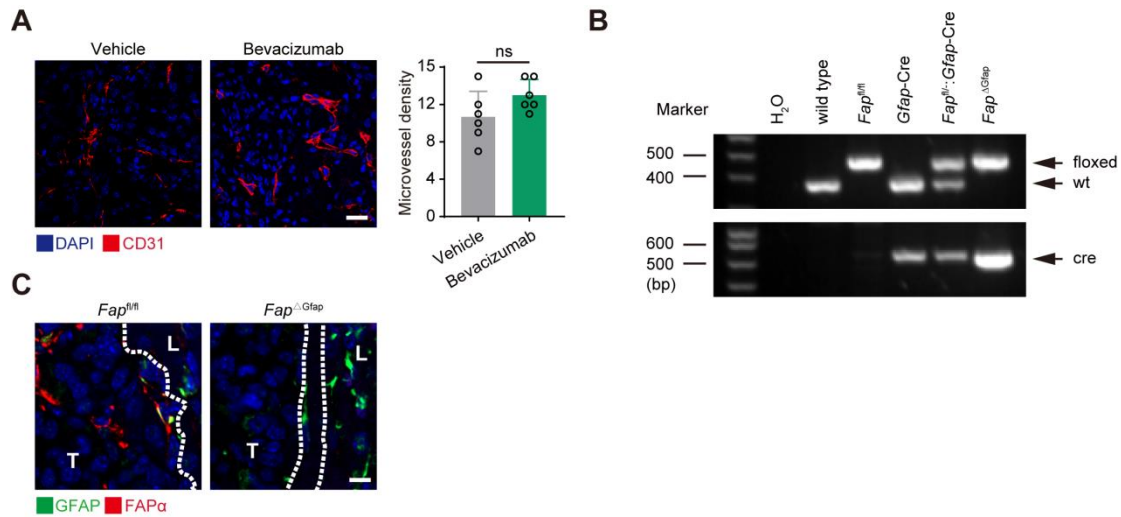

**Supplemental Figure 2. Characteristics of the HSC-specific conditional *Fap*-knockout mice and the MC38 CRCLM allografts.** (A) Immunofluorescence staining of CD31<sup>+</sup> tumor vessels (red) in MC38 CRCLM allografts. Quantification of microvessel density is shown (n = 6). Scale bar, 20  $\mu\text{m}$ . (B) Genotyping of the transgenic mice. The genomic DNA derived from the indicated mice were analyzed by PCR assay, and the DNA fragments were separated on 2% agarose gels (n = 6). (C) Immunofluorescence staining of FAP $\alpha$  (red) in the GFAP<sup>+</sup> HSCs (green) in MC38 CRCLM allografts (n = 6). Scale bar, 10  $\mu\text{m}$ . Data are presented as mean  $\pm$  SEM. ns, no significance.

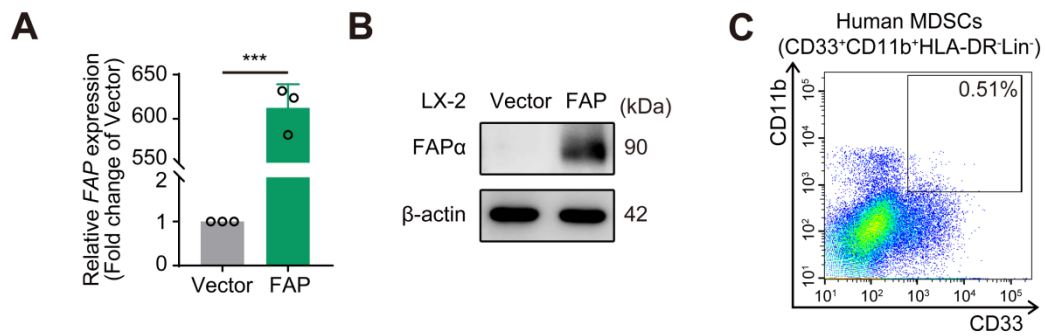

**Supplemental Figure 3. FAP $\alpha$ <sup>+</sup> HSCs facilitate vessel co-option via promoting recruitment of MDSCs and tumor cell EMT.** (A) RT-qPCR analysis of the levels of FAP in LX-2 cells (n = 3). (B) Western blotting analysis of the expression of FAP $\alpha$  in LX-2 cells. (C) FCM analysis of MDSCs isolated from human CRC tumor samples. Data are presented as mean  $\pm$  SEM. \*\*\* $P$  < 0.001 (2-tailed unpaired  $t$  test).

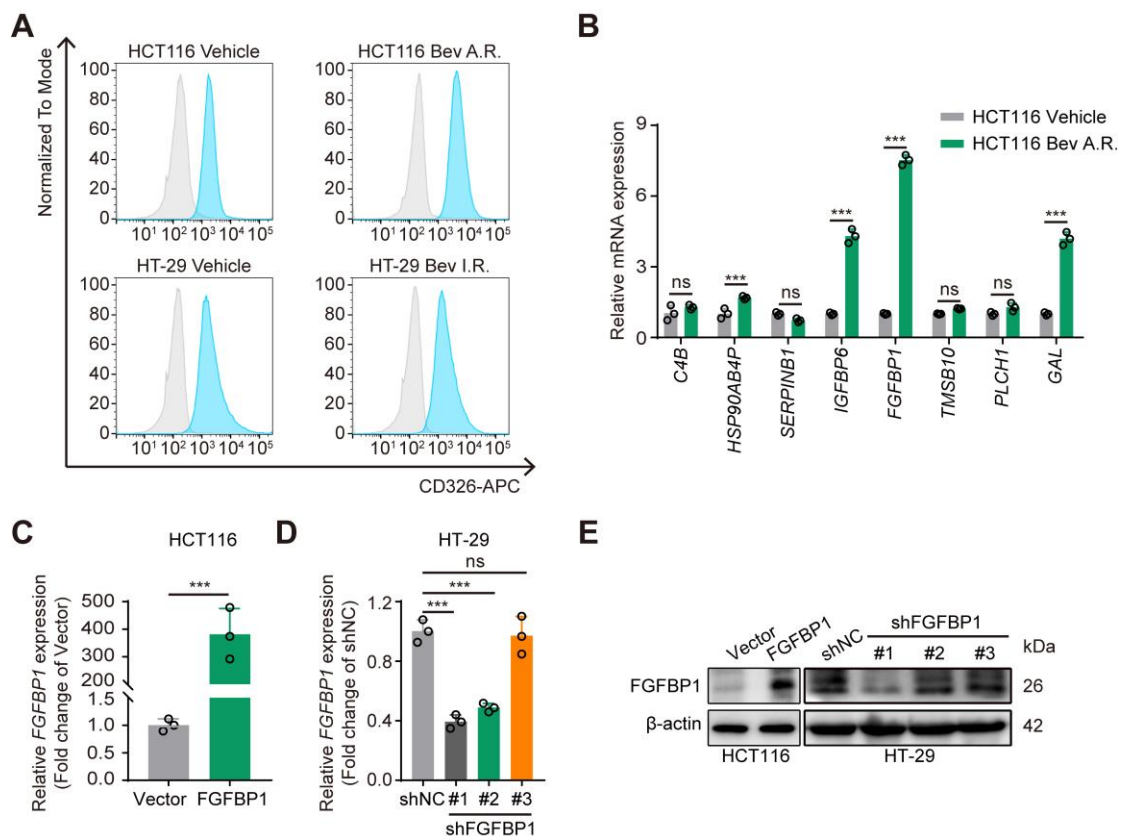

**Supplemental Figure 4. Evaluation of the expression of FGFBP1 in HCT116 or HT-29 cells.** (A) FCM analysis of the primary tumor cells isolated from bevacizumab-

sensitive or -resistant CRCLM xenografts. (B) RT-qPCR analysis of the levels of genes indicated by proteomic assay in HCT116 cells (n = 3). (C) RT-qPCR analysis of the overexpression of *FGFBP1* in HCT116 cells (n = 3). (D) RT-qPCR analysis of the knockdown of *FGFBP1* in HT-29 cells (n = 3). (E) Western blotting analysis of FGFBP1 in HCT116 and HT-29 cells after the indicated transfections. Data are presented as mean  $\pm$  SEM. ns, no significance, \*\*\* $P < 0.001$  (2-tailed unpaired *t* test in B, C; 1-way ANOVA with Tukey's post hoc comparison in D).

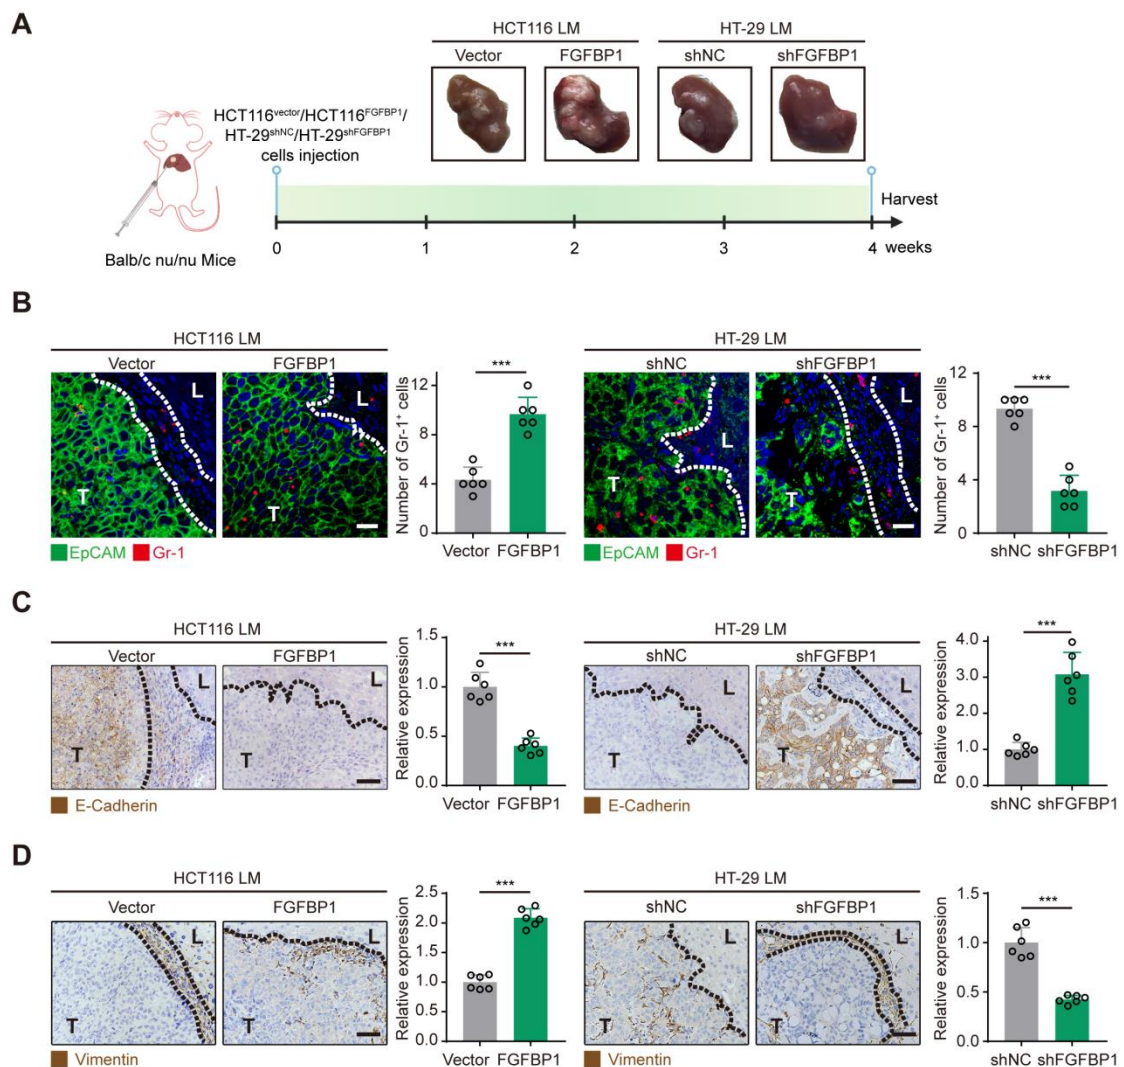

**Supplemental Figure 5. Tumor-derived FGFBP1 promotes of MDSC recruitment and tumor cell EMT in CRCLM xenografts.** (A) Schematic showing the

establishment of the FGFBP1-knockdown or -overexpression CRCLM xenografts. Tumors were harvested and photographed at the end of experiments (n = 6). (B) Immunofluorescence staining of EpCAM<sup>+</sup> (green) tumor cells and Gr-1<sup>+</sup> MDSCs (red) in the tumor-liver interface of CRCLM xenografts. Scale bar, 50  $\mu$ m. Quantification of Gr-1<sup>+</sup> MDSCs is shown (n = 6). (C) Immunohistochemical staining and quantification of E-cadherin in the tumor-liver interface of CRCLM xenografts (n = 6). Scale bar, 50  $\mu$ m. (D) Immunohistochemical staining and quantification of vimentin in the tumor-liver interface of CRCLM xenografts (n = 6). Scale bar, 50  $\mu$ m. Dotted lines indicate the tumor-liver interface. LM, liver metastases; T, Tumor; L, Liver. Data are presented as mean  $\pm$  SEM. \*\*\**P* < 0.001 (2-tailed unpaired *t* test).

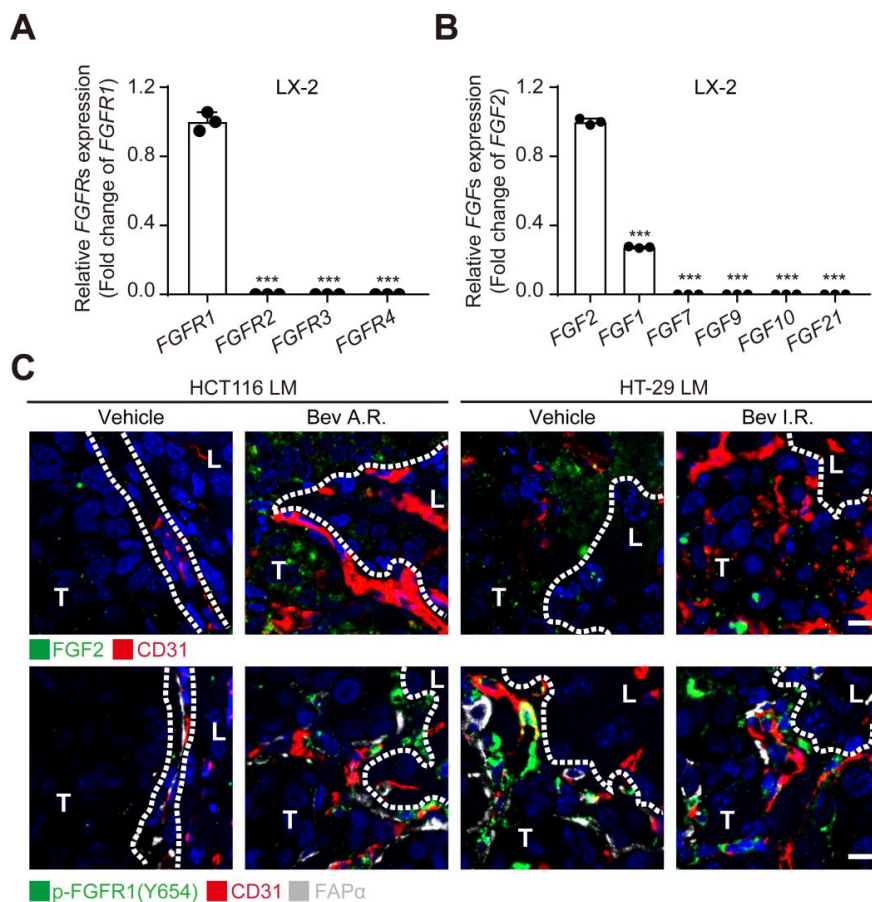

**Supplemental Figure 6. FGF2 and FGFR1 are highly expressed in HSCs.** (A) RT-qPCR assay analysis of the levels of *FGFRs* in LX-2 cells (n = 3). (B) RT-qPCR assay

analysis of the levels of *FGFs* in LX-2 cells (n = 3). (C) Immunofluorescence staining of FGF2<sup>+</sup> (green), p-FGFR1<sup>+</sup> (green), or FAP $\alpha$ <sup>+</sup> (gray) HSCs, and CD31<sup>+</sup> sinusoidal blood vessels (red) in the tumor-liver interface of CRCLM xenografts (n = 6). Scale bar, 10  $\mu$ m. Data are presented as mean  $\pm$  SEM. \*\*\**P* < 0.001 compared to *FGFR1* or *FGF1* group (1-way ANOVA with Tukey's post hoc comparison).

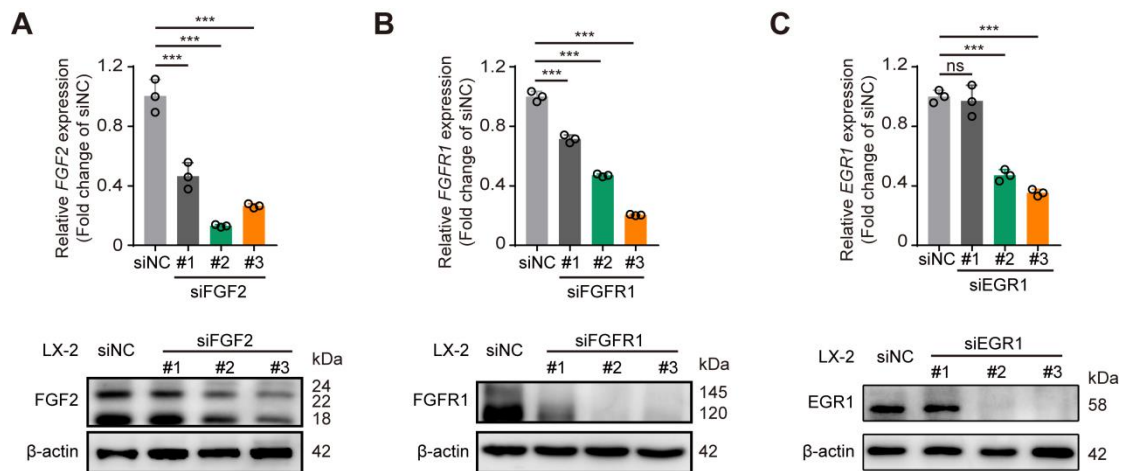

**Supplemental Figure 7. Validation of knockdown efficiency of FGF2, FGFR1, and EGR1 in HSCs.** (A-C) RT-qPCR and Western blotting analysis of the knockdown of FGF2 (A), FGFR1 (B), and EGR1 (C) in LX-2 cells (n = 3). Data are presented as mean  $\pm$  SEM. ns, no significance, \*\*\**P* < 0.001 (1-way ANOVA with Tukey's post hoc comparison).

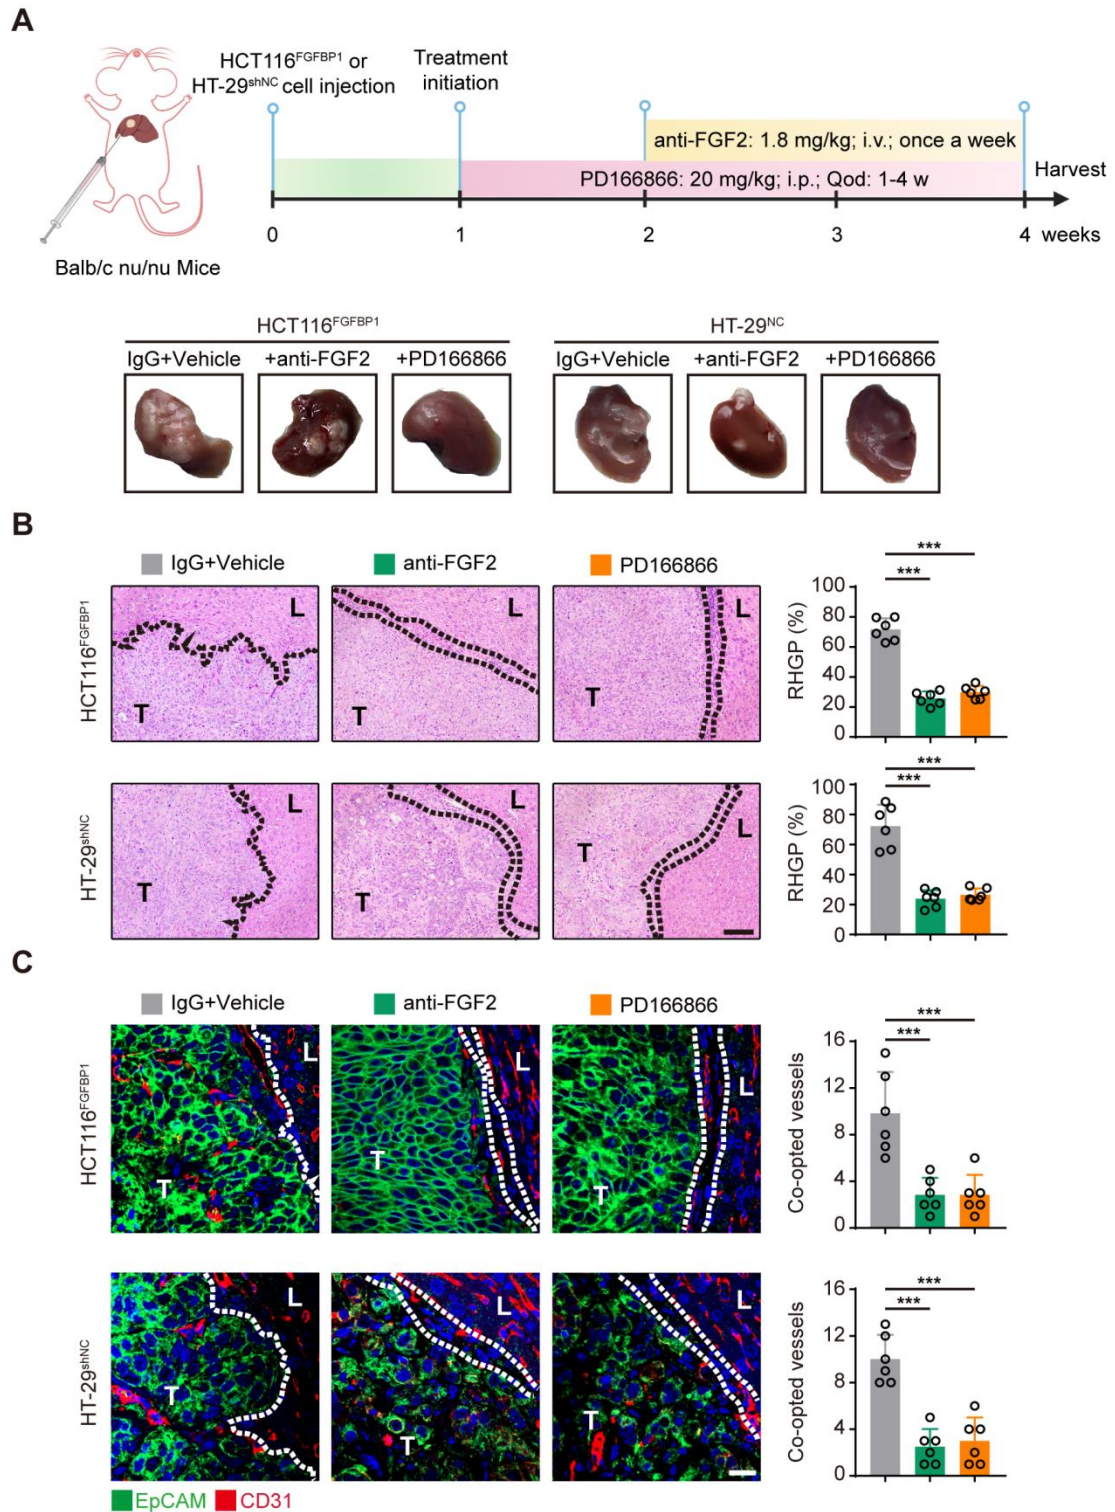

**Supplemental Figure 8. Evaluation of the efficacy of FGF2 neutralizing antibody or PD166866 in FGFBP1-overexpressing CRCLM xenografts.** (A) Experimental design of the FGF2 neutralizing antibody and PD-166866 (an FGFR1 inhibitor) treatments in HCT116 or HT-29 CRCLM xenografts (n = 6). (B) H&E staining of the



tumor-liver interface of CRCLM xenografts. Scale bar: 100  $\mu\text{m}$ . Quantification of RHGP is shown ( $n = 6$ ). (C) Immunofluorescence staining of the EpCAM<sup>+</sup> tumor cells (green) infiltrated into the liver parenchyma and hijacked the CD31<sup>+</sup> sinusoidal blood vessels (red) in the tumor-liver interface of CRCLM xenografts. Scale bar: 20  $\mu\text{m}$ . Quantification of the co-opted sinusoidal blood vessels is shown ( $n = 6$ ). Data are presented as mean  $\pm$  SEM. \*\*\* $P < 0.001$ (1-way ANOVA with Tukey's post hoc comparison).

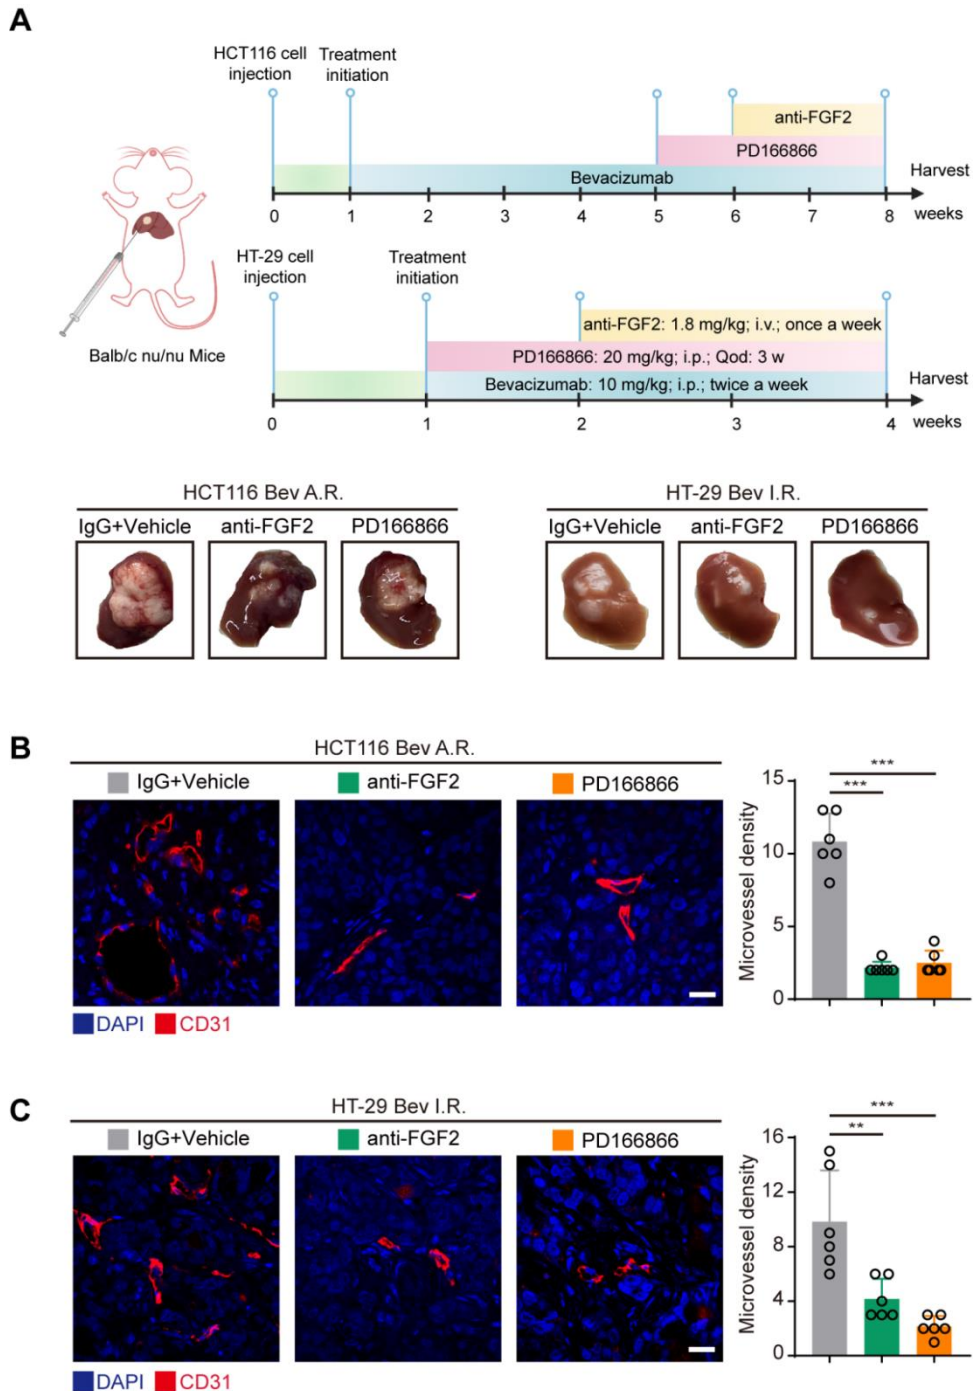

**Supplemental Figure 9. Evaluation of the efficacy of FGF2 neutralizing antibody or PD166866 in bevacizumab-resistant CRCLM xenografts.** (A) Therapeutic schedule for HCT116 and HT-29 xenografts treated with bevacizumab with or without FGF2 neutralizing antibody or PD166866 (n = 6). (B) Immunofluorescence staining and quantification of CD31<sup>+</sup> tumor vessels (red) in HCT116 CRCLM xenografts (n = 6). Scale bar, 20  $\mu$ m. (C) Immunofluorescence staining and quantification of CD31<sup>+</sup>

tumor vessels (red) in HT-29 CRCLM xenografts (n = 6). Scale bar, 20  $\mu$ m. Data are presented as mean  $\pm$  SEM. \*\* $P < 0.01$ , \*\*\* $P < 0.001$  (1-way ANOVA with Tukey's post hoc comparison).

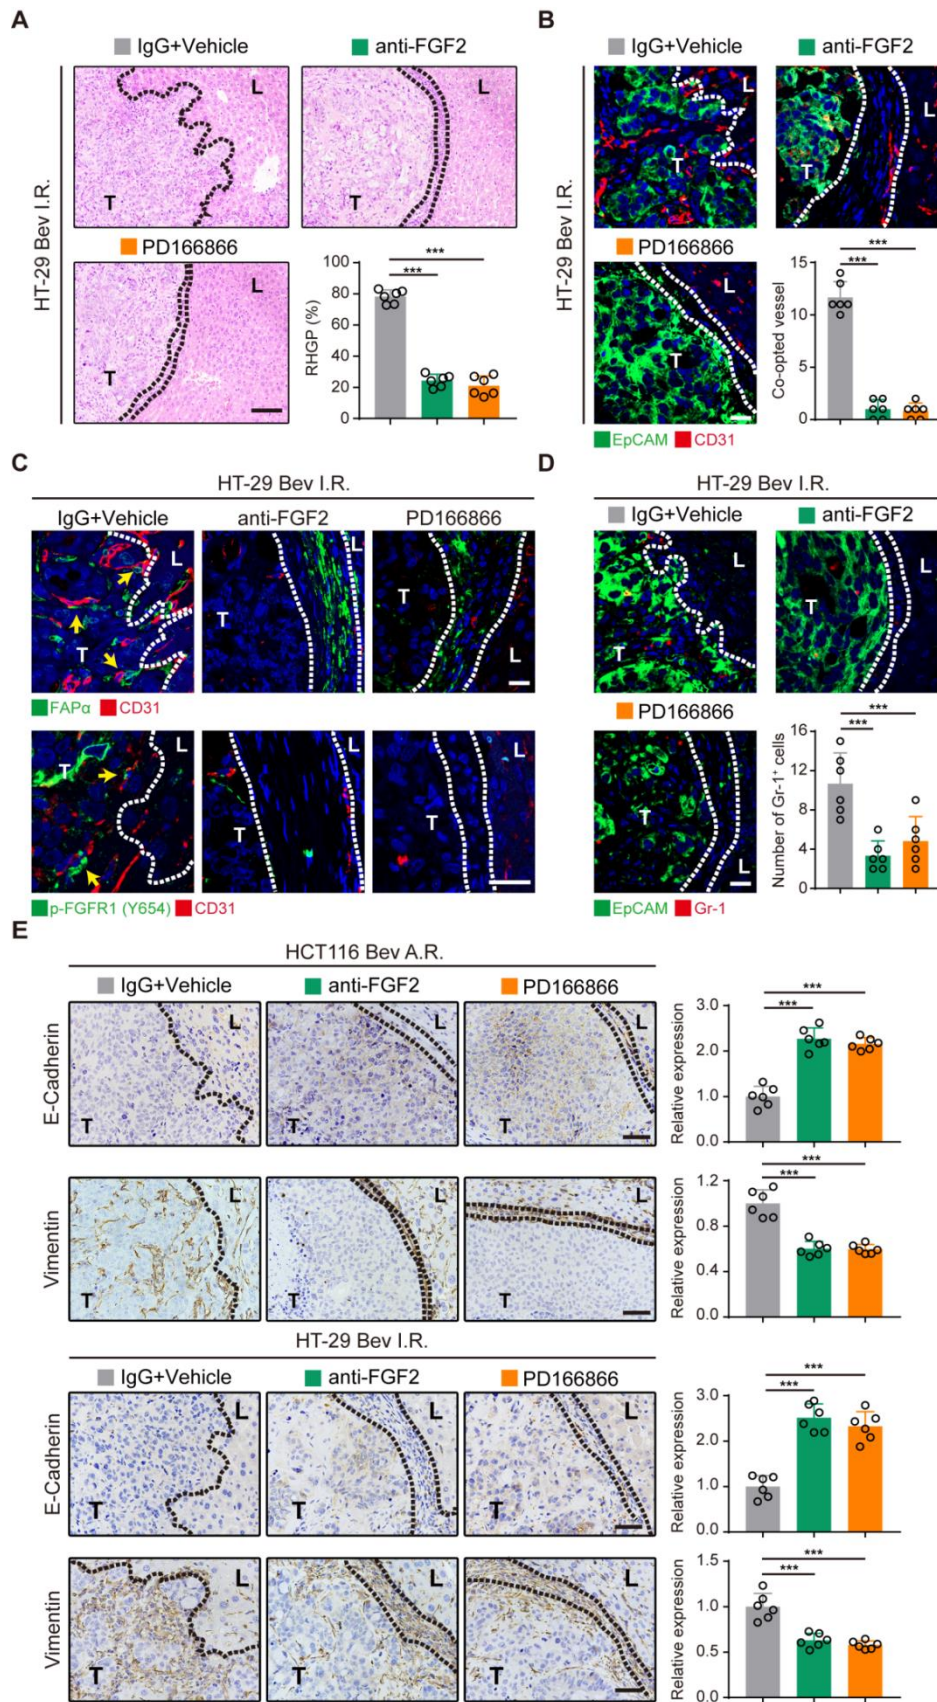

**Supplemental Figure 10. Blockade of FGF2-FGFR1 signaling pathway in HSCs attenuates the bevacizumab-induced vessel co-option.** (A) H&E staining of the

tumor-liver interface of HT-29 CRCLM xenografts. Scale bar: 100  $\mu\text{m}$ . Quantification of RHGP is shown ( $n = 6$ ). (B) Immunofluorescence staining of the EpCAM<sup>+</sup> tumor cells (green) infiltrated into the liver parenchyma and hijacked the CD31<sup>+</sup> sinusoidal blood vessels (red) in the tumor-liver interface of HT-29 CRCLM xenografts. Scale bar: 20  $\mu\text{m}$ . Quantification of the co-opted sinusoidal blood vessels is shown ( $n = 6$ ). (C) Immunofluorescence staining of the FAP $\alpha$  (green) and p-FGFR1<sup>+</sup> in HSCs attached on the CD31<sup>+</sup> sinusoidal blood vessels (red) in the tumor-liver interface of HT-29 CRCLM xenografts. Scale bar, 20  $\mu\text{m}$ . Yellow arrows indicate the FAP $\alpha$ <sup>+</sup> or p-FGFR1<sup>+</sup> HSCs. (D) Immunofluorescence staining of the EpCAM<sup>+</sup> (green) tumor cells and Gr-1<sup>+</sup> MDSCs (red) in the tumor-liver interface of HT-29 CRCLM xenografts. Scale bar, 20  $\mu\text{m}$ . Quantification of Gr-1<sup>+</sup> MDSCs is shown ( $n = 6$ ). (E) Immunohistochemical staining and quantification of E-cadherin and vimentin in the tumor-liver interface of HCT116 and HT-29 CRCLM xenografts ( $n = 6$ ). Scale bar, 50  $\mu\text{m}$ . Dotted lines indicate the tumor-liver interface. Bev I.R., bevacizumab intrinsic resistance. T, Tumor. L, Liver. Data are presented as mean  $\pm$  SEM. \*\*\* $P < 0.001$  (1-way ANOVA with Tukey's post hoc comparison).

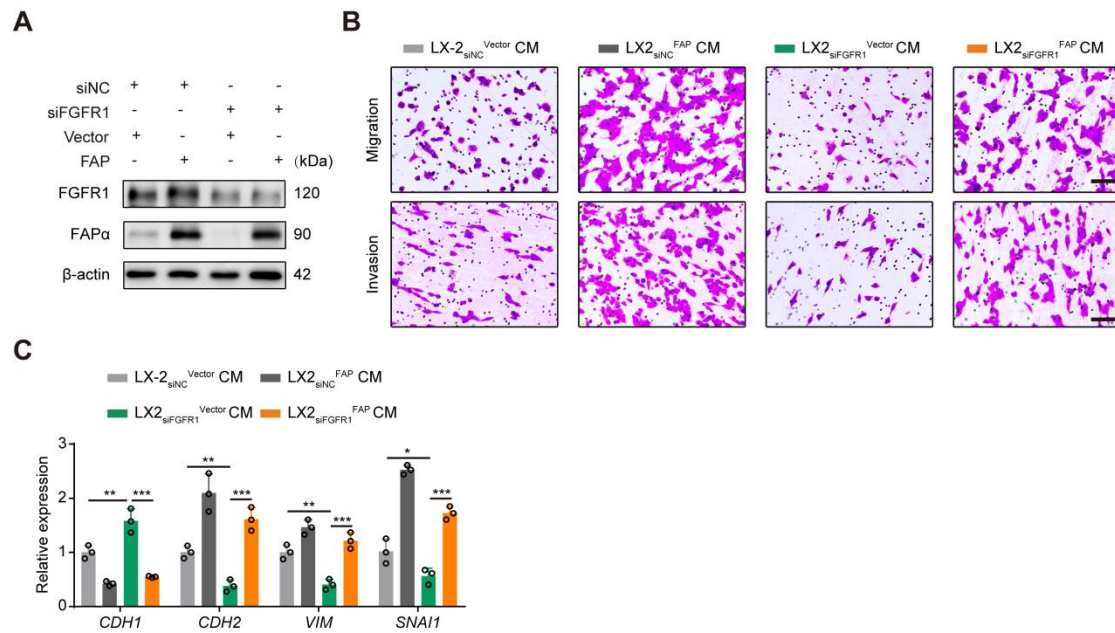

**Supplemental Figure 11. FGFR1-FAP $\alpha$  axis is essential for tumor cell EMT.** (A) Western blotting analysis of FGFR1 and FAP $\alpha$  in LX-2 cells with FGFR1-knockdown and/or FAP $\alpha$ -overexpression. (B) Transwell assays of the migration and invasion of HCT116 cells treated with the conditioned medium from LX-2 cells (n = 3). (C) RT-qPCR analysis of *CDH1*, *CDH2*, *SNAIL*, and *VIM* in HCT116 cells treated with the conditioned medium from LX-2 cells (n = 3). Data are presented as mean  $\pm$  SEM. ns, no significance; \* $P$  < 0.05, \*\* $P$  < 0.01, and \*\*\* $P$  < 0.001 (1-way ANOVA with Tukey's post hoc comparison). CM: conditioned medium.

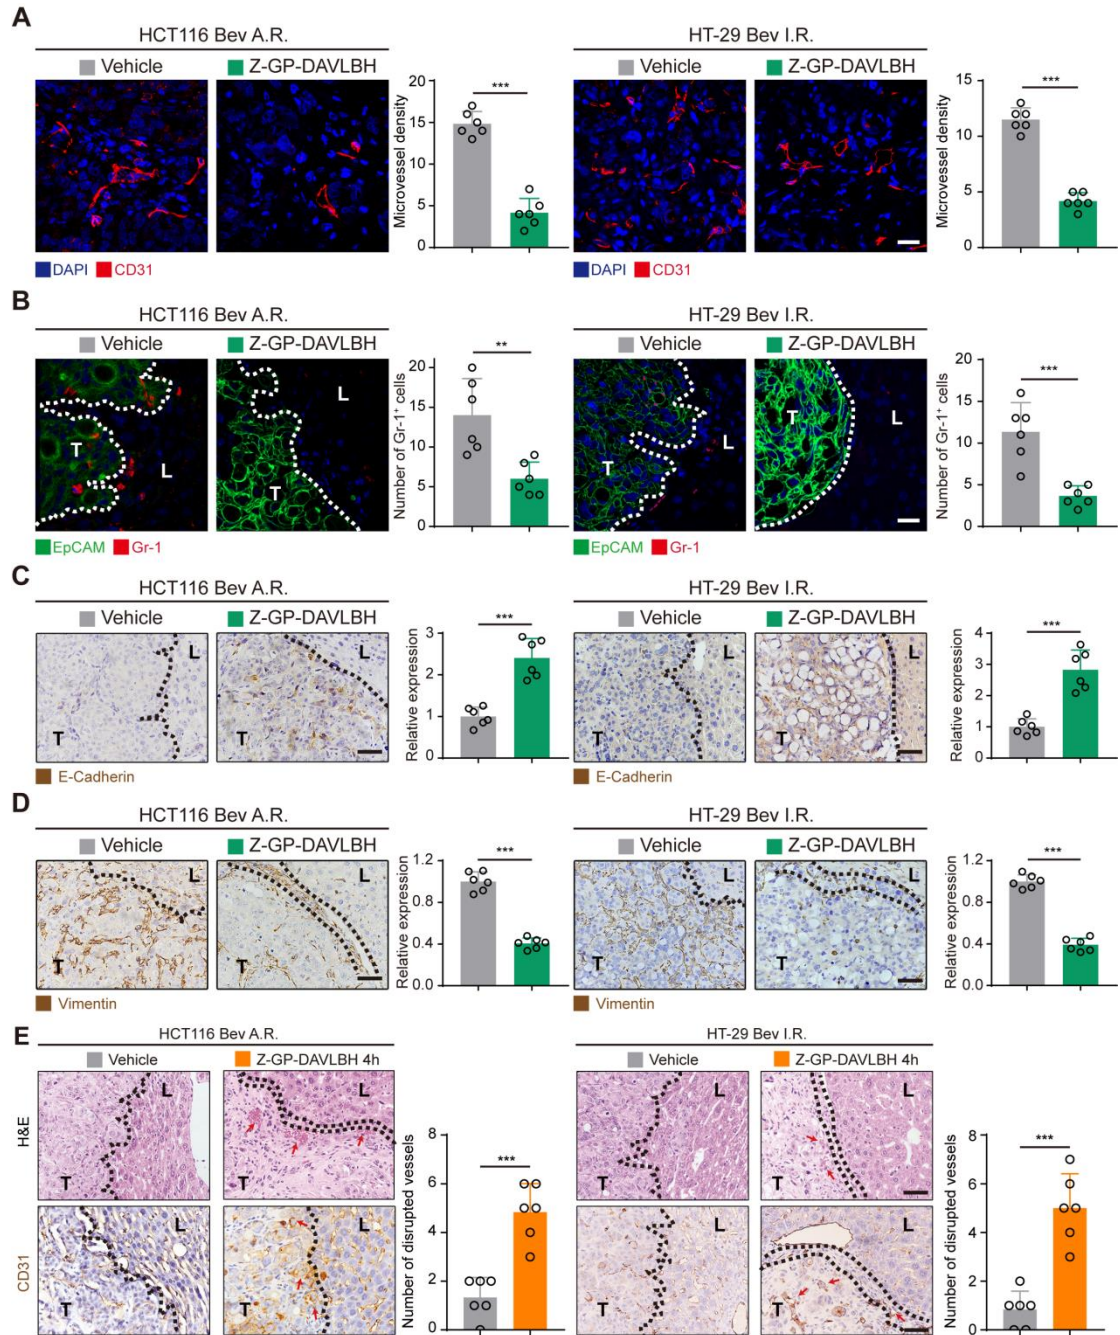

**Supplemental Figure 12. Z-GP-DAVLBH inhibits the recruitment of MDSCs and tumor cell EMT.** (A) Immunofluorescence staining and quantification of CD31<sup>+</sup> tumor vessels (red) in HCT116 and HT-29 CRCLM xenografts (n = 6). Scale bar, 20  $\mu$ m. (B) Immunofluorescence staining of Gr-1<sup>+</sup> MDSCs (red) and EpCAM<sup>+</sup> tumor cells (green) in the liver-tumor interface of CRCLM xenografts. Scale bar, 20  $\mu$ m. Quantification of Gr-1<sup>+</sup> MDSCs is shown (n = 6). (C) Immunohistochemical staining and quantification of E-cadherin in the liver-tumor interface of CRCLM xenografts (n = 6). Scale bar, 50

μm. (D) Immunohistochemical staining and quantification of vimentin in the tumor-liver interface of CRCLM xenografts (n = 6). Scale bar, 50 μm. (E) H&E and immunohistochemical staining showed that Z-GP-DAVLBH induced vessel disruption in the tumor-liver interface of CRCLM xenografts. Red arrows indicate the “hole-like” disruptions in the tumor vessels. Scale bar, 50 μm. Quantification of the disrupted vessels is shown (n = 6). T, Tumor. L, Liver. Data are presented as mean ± SEM. \*\**P* < 0.01, \*\*\**P* < 0.001 (2-tailed unpaired *t* test).

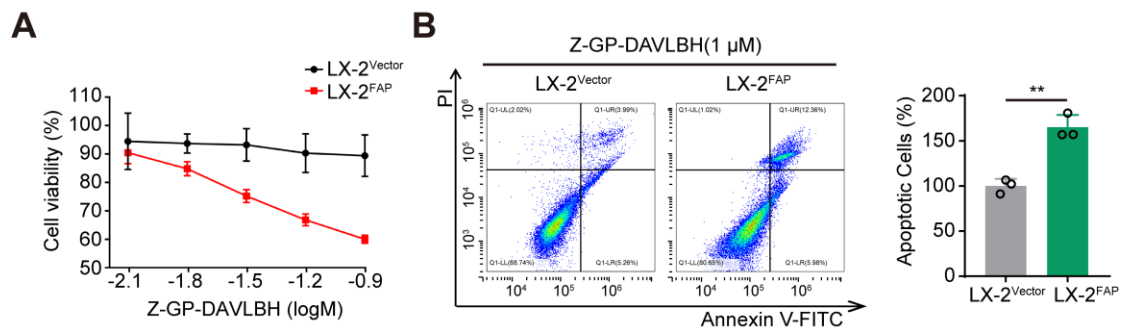

**Supplemental Figure 13. Z-GP-DAVLBH selectively induces apoptosis in FAP $\alpha$ <sup>+</sup> HSCs.** (A) CCK-8 assay analysis of the effect of Z-GP-DAVLBH on the cell viability of LX-2 cells (n = 3). (B) FCM analysis of the apoptotic LX-2 cells after treatment with Z-GP-DAVLBH (1 μM) for 4 h (n = 3). Data are presented as mean ± SEM. \*\**P* < 0.01 (2-tailed unpaired *t* test).



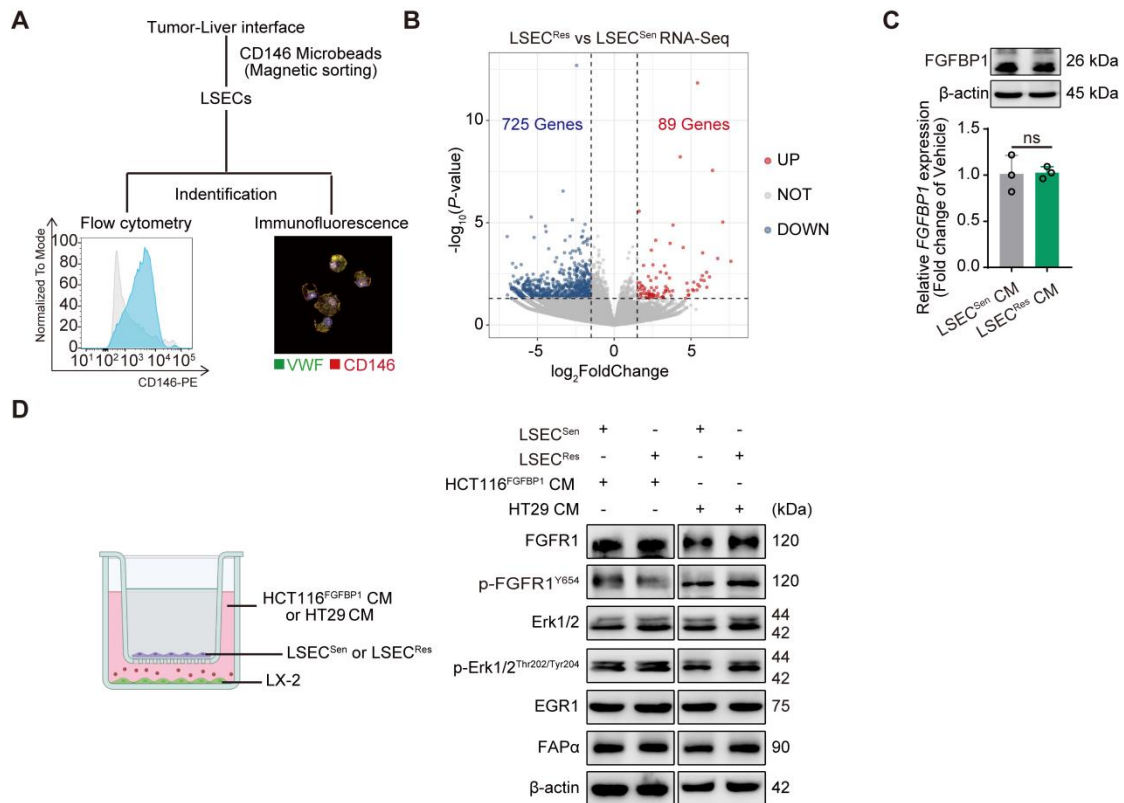

**Supplemental Figure 14. Effects of liver sinusoidal endothelial cells on LX2 cells and HCT116 cells.** (A) Schematic diagram of the isolation and identification of primary LSECs from the liver-tumor interface of HCT116 CRCLM xenografts. (B) Volcano plot depicting the differentially expressed genes in LSECs obtained from bevacizumab-sensitive and -resistant HCT116 CRCLM xenografts ( $\log_2\text{FoldChange} > 1.5$ ,  $P\text{-value} < 0.05$ ;  $n = 3$ ). Res, bevacizumab-resistant. Sen, bevacizumab-sensitive. (C) RT-qPCR and Western blotting analysis of FGFBP1 in HCT116 cells treated with the conditioned medium from LSECs ( $n = 3$ ). (D) Western blotting analysis of FGFR1, p-FGFR1, ERK1/2, p-ERK1/2, EGR1, and FAP $\alpha$  in LX-2 cells cocultured with LSECs and treated with the conditioned medium from HCT116 or HT-29 cells. Data are presented as mean  $\pm$  SEM. ns, no significance (2-tailed unpaired  $t$  test). CM: conditioned medium.

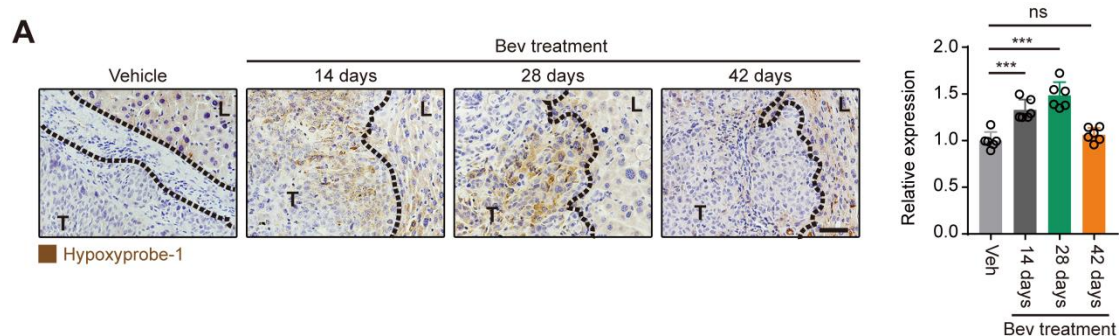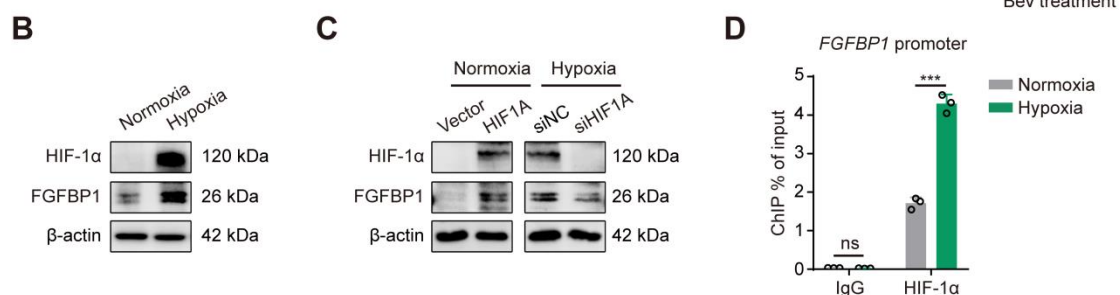

**Supplemental Figure 15. Hypoxia is responsible for the expression of FGFBP1 in tumor cells.** (A) Immunohistochemical staining and quantification of hypoxyprobe-1 in bevacizumab-treated HCT116 CRCLM xenografts (n = 6). Scale bar, 50  $\mu$ m. (B) Western blotting analysis of HIF-1 $\alpha$  and FGFBP1 in normoxic or hypoxic HCT116 cells. (C) Western blotting analysis of HIF-1 $\alpha$  and FGFBP1 in normoxic or hypoxic HCT116 cells with HIF1 $\alpha$ -overexpression or -knockdown. (D) ChIP-qPCR analysis of the binding of HIF-1 $\alpha$  to the *FGFBP1* promoter (n = 3). Data are presented as mean  $\pm$  SEM. ns, no significance; \*\*\* $P$  < 0.001 (1-way ANOVA with Tukey's post hoc comparison in A; 2-tailed unpaired  $t$  test in D).

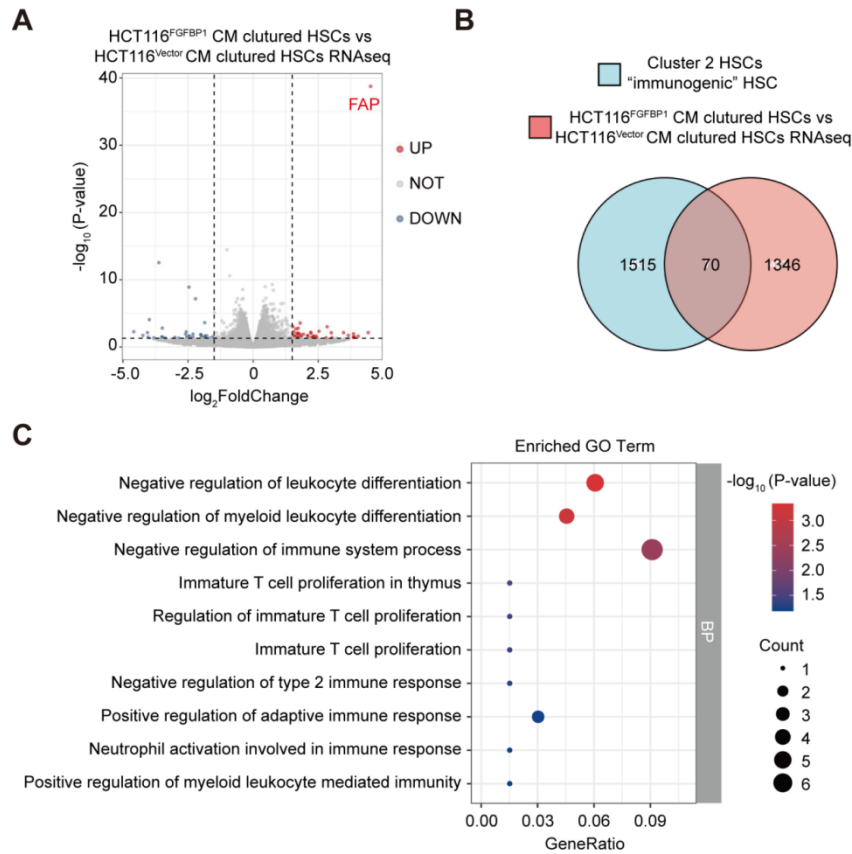

**Supplemental Figure 16. HSCs may partially transform into an "immunogenic" phenotype during vessel co-option.** (A) Volcano Plot depicting differentially expressed genes in LX-2 cells primed with the conditioned medium from HCT116 cells ( $\log_2\text{FoldChange} > 1.5$ ,  $P\text{-value} < 0.05$ ;  $n = 3$ ). (B) Venn diagram illustrating the overlapping genes between the upregulated genes in HCT116 cell conditioned medium-treated LX-2 cells analyzed by RNA-seq and the differential expression genes (DEG) in cluster 4 HSCs ("immunogenic" HSCs) analyzed by scRNA-seq (GSE171904). (C) Gene ontology (GO) enrichment analysis of the 70 overlapping genes in (B).

**Supplemental Table 1.** Characteristics of 45 patients (n = 53 lesions) treated preoperatively with Chemo or Chemo+Bev prior to liver resection at Guangzhou Overseas Chinese Hospital (Detailed patients' information in Figure 7A).

| <b>Demographics</b>                                          |              |
|--------------------------------------------------------------|--------------|
| Gender, number of patients (%)                               |              |
| Male                                                         | 32 (71.1)    |
| Female                                                       | 13 (28.9)    |
| Age, median (range)                                          | 56 (27 – 75) |
| <b>Primary tumor</b>                                         |              |
| Site of primary tumor, number of patients (%)                |              |
| Rectum                                                       | 24 (53.3)    |
| Recto–sigmoid                                                | 11 (24.5)    |
| Colon                                                        | 10 (22.2)    |
| Lymph node status, number of patients (%)                    |              |
| Positive                                                     | 28 (62.2)    |
| Negative                                                     | 17 (37.8)    |
| Histological grade, number of patients (%)                   |              |
| High grade                                                   | 1 (2.2)      |
| Moderate grade                                               | 42 (93.3)    |
| Low grade                                                    | 2 (4.5)      |
| Adjuvant Bev therapy, number of patients (%)                 |              |
| Yes                                                          | 31 (68.9)    |
| No                                                           | 14 (31.1)    |
| <b>Liver metastasis</b>                                      |              |
| No. of liver lesions at presentation, number of patients (%) |              |
| Solitary lesion                                              | 40 (88.9)    |
| Multiple lesions                                             | 5 (11.1)     |
| Preoperative therapy administered, number of patients (%)    |              |
| CAPOX + bevacizumab                                          | 4 (8.9)      |
| FOLFOX + bevacizumab                                         | 14 (31.1)    |
| FOLFIRI + bevacizumab                                        | 9 (20.0)     |
| FOLFOXIRI+ bevacizumab                                       | 3 (6.7)      |
| Oxaliplatin+Capecitabine+Bevacizumab                         | 1 (2.2)      |
| FOLFOX                                                       | 7 (15.5)     |
| FOLFIRI                                                      | 3 (6.7)      |
| CAPOX                                                        | 4 (8.9)      |

**Footnote:** CAPOX, capecitabine and oxaliplatin; FOLFOX, infusional 5-fluorouracil and oxaliplatin; FOLFIRI, infusional 5-fluorouracil and irinotecan; FOLFOXIRI, infusional 5-fluorouracil, oxaliplatin and irinotecan. See Supplemental Table 11 for further detailed information.

**Supplemental Table 2.** Characteristics of 66 patients (n = 82 lesions) treated preoperatively with Chemo or Chemo+Bev prior to liver resection at Guangzhou Overseas Chinese Hospital (Detailed patients' information in Figure 7, B-E).

| <b>Demographics</b>                                          |              |
|--------------------------------------------------------------|--------------|
| Gender, number of patients (%)                               |              |
| Male                                                         | 45 (68.2)    |
| Female                                                       | 21 (31.8)    |
| Age, median (range)                                          | 56 (27 – 75) |
| <b>Primary tumor</b>                                         |              |
| Site of primary tumor, number of patients (%)                |              |
| Rectum                                                       | 28 (42.4)    |
| Recto–sigmoid                                                | 21 (31.8)    |
| Colon                                                        | 16(24.3)     |
| Cecum                                                        | 1(1.5)       |
| Lymph node status, number of patients (%)                    |              |
| Positive                                                     | 41 (62.1)    |
| Negative                                                     | 25 (37.9)    |
| Histological grade, number of patients (%)                   |              |
| High grade                                                   | 3 (4.5)      |
| Moderate grade                                               | 59 (89.4)    |
| Low grade                                                    | 4 (6.1)      |
| Adjuvant Bev therapy, number of patients (%)                 |              |
| Yes                                                          | 37 (56.1)    |
| No                                                           | 29 (43.9)    |
| <b>Liver metastasis</b>                                      |              |
| No. of liver lesions at presentation, number of patients (%) |              |
| Solitary lesion                                              | 54 (81.8)    |
| Multiple lesions                                             | 12 (18.2)    |
| Preoperative therapy administered, number of patients (%)    |              |
| CAPOX + bevacizumab                                          | 11 (16.7)    |
| FOLFOX + bevacizumab                                         | 15 (22.7)    |
| FOLFIRI + bevacizumab                                        | 8 (12.1)     |
| FOLFOXIRI+ bevacizumab                                       | 3 (4.5)      |
| CAPOX                                                        | 10 (15.2)    |
| FOLFOX                                                       | 12 (18.2)    |
| FOLFIRI                                                      | 2(3.0)       |
| FOLFOXIRI                                                    | 5 (7.6)      |

**Footnote:** CAPOX, capecitabine and oxaliplatin; FOLFOX, infusional 5-fluorouracil and oxaliplatin; FOLFIRI, infusional 5-fluorouracil and irinotecan; FOLFOXIRI, infusional 5-fluorouracil, oxaliplatin and irinotecan. See Supplemental Table 12 for further detailed information.

**Supplemental Table 3.** Characteristics of 34 patients (n = 42 lesions) treated preoperatively with Chemo or Chemo+Bev prior to liver resection at Guangzhou Overseas Chinese Hospital (Detailed patients' information in Figure 7F).

| <b>Demographics</b>                                          |              |
|--------------------------------------------------------------|--------------|
| Gender, number of patients (%)                               |              |
| Male                                                         | 22 (64.7)    |
| Female                                                       | 12 (35.3)    |
| Age, median (range)                                          | 55 (28 – 73) |
| <b>Primary tumor</b>                                         |              |
| Site of primary tumor, number of patients (%)                |              |
| Rectum                                                       | 11 (32.3)    |
| Recto–sigmoid                                                | 14 (41.2)    |
| Colon                                                        | 8(23.5)      |
| Cecum                                                        | 1 (3.0)      |
| Lymph node status, number of patients (%)                    |              |
| Positive                                                     | 21 (61.8)    |
| Negative                                                     | 13 (38.2)    |
| Histological grade, number of patients (%)                   |              |
| High grade                                                   | 2 (5.9)      |
| Moderate grade                                               | 30 (88.2)    |
| Low grade                                                    | 2 (5.9)      |
| Adjuvant Bev therapy, number of patients (%)                 |              |
| Yes                                                          | 18 (52.9)    |
| No                                                           | 16 (47.1)    |
| <b>Liver metastasis</b>                                      |              |
| No. of liver lesions at presentation, number of patients (%) |              |
| Solitary lesion                                              | 28 (82.4)    |
| Multiple lesions                                             | 6 (17.6)     |
| Preoperative therapy administered, number of patients (%)    |              |
| FOLFOX + bevacizumab                                         | 7 (20.6)     |
| FOLFIRI + bevacizumab                                        | 3 (8.8)      |
| FOLFOXIRI+ bevacizumab                                       | 1 (3.0)      |
| CAPOX+ bevacizumab                                           | 6 (17.6)     |
| Oxaliplatin+Capecitabine+Bevacizumab                         | 1 (3.0)      |
| FOLFOX                                                       | 6 (17.6)     |
| FOLFOXIRI                                                    | 3 (8.8)      |
| CAPOX                                                        | 7 (20.6)     |

**Footnote:** CAPOX, capecitabine and oxaliplatin; FOLFOX, infusional 5-fluorouracil and oxaliplatin; FOLFIRI, infusional 5-fluorouracil and irinotecan; FOLFOXIRI, infusional 5-fluorouracil, oxaliplatin and irinotecan. See Supplemental Table 13 for further detailed information.

**Supplemental Table 4.** List of primers sequences for PCR analysis of genomic DNA from tail snips.

| Primer name | Sequence                | Band Size      |
|-------------|-------------------------|----------------|
| T004857-F1A | GGGCAGTCTGGTACTTCCAAGCT | WT:0bp         |
| T004857-R1A | GGGCAGUAUAAACUUGGAUTT   | Targeted:515bp |
| T052266-F1  | CATCGCATTGTCTGAGTAGGTG  | WT:365bp       |
| T052266-R1  | CTCCAGCAAGGCTGCACAAT    | Targeted:467bp |

**Supplemental Table 5.** List of shRNA sequences for cell transfection.

| Gene name              | Target sequence       |
|------------------------|-----------------------|
| <i>FGFBP1</i> -shRNA-1 | GAGGGCATCTCTCTCAAGGTT |
| <i>FGFBP1</i> -shRNA-2 | AAGCTAGTCAGCTCCACTCTA |
| <i>FGFBP1</i> -shRNA-3 | CAGGGAGCACATCAAAGGCAA |

**Supplemental Table 6.** List of siRNA sequences for cell transfection.

| Gene name               | Sense sequence (5' to 3') | Antisense sequence (5' to 3') |
|-------------------------|---------------------------|-------------------------------|
| <i>FGF2</i> -Homo-638   | CCCUCACAUCAAGCUACAATT     | UUGUAGCUUGAUGUGAGGGTT         |
| <i>FGF2</i> -Homo-693   | GGAGUGUGUGCUAACCGUUTT     | AACGGUUAGCACACACUCCTT         |
| <i>FGF2</i> -Homo-858   | GGGCAGUAUAAACUUGGAUTT     | AUCCAAGUUUUAUCUGCCCTT         |
| <i>FGFR1</i> -Homo-1265 | GCAGUGACACCACCUACUUTT     | AAGUAGGUGGUGUCACUGCTT         |
| <i>FGFR1</i> -Homo-2598 | GCAGGAUGGUCCCUUGUAUTT     | AUACAAGGGACCAUCCUGCTT         |
| <i>FGFR1</i> -Homo-3116 | GCACCAACGAGCUGUACAUTT     | AUGUACAGCUCGUUGGUGCTT         |
| <i>EGRI</i> -Homo-1354  | CCCGUUACUACCUCUUAUTT      | AUAAGAGGUAGUAACCGGGTT         |
| <i>EGRI</i> -Homo-1264  | GGACAAGAAAGCAGACAAATT     | UUUGUCUGCUUUCUUGUCCTT         |
| <i>EGRI</i> -Homo-324   | CUCUGAACACGAGAAGGUTT      | ACCUUCUCGUUGUUCAGAGTT         |
| <i>HIF1A</i> -Homo-964  | GCUGAUUUGUGAACCCAUUTT     | AAUGGGUUCACAAAUCAGCTT         |

**Supplemental Table 7.** List of antibodies for immunohistochemistry and immunofluorescence.

| Antibodies                | Supplier; catalogue number |
|---------------------------|----------------------------|
| Goat anti-CD31            | R&D System; AF3628         |
| Rabbit anti- CD31         | Servicebio; GB14033        |
| Rabbit anti-EpCAM         | Abcam; ab71916             |
| Sheep anti-FAP $\alpha$   | R&D System; AF3715         |
| Rabbit anti- FAP $\alpha$ | Affinity; AF5344           |
| Mouse anti-Gr-1           | R&D System; MAB1037        |

|                                      |                                |
|--------------------------------------|--------------------------------|
| Rabbit anti-CD8                      | Abcam; ab217344                |
| Mouse anti- $\alpha$ -SMA            | Servicebio; GB13044            |
| Rabbit anti-GFAP                     | Servicebio; GB11096            |
| Rabbit anti-CK18                     | Servicebio; GB11232            |
| Mouse anti-E-Cadherin                | Cell Signal Technology; 14472S |
| Mouse anti-Vimentin                  | Abcam; ab8978                  |
| Rabbit anti-N-cadherin               | Proteintech; 22018-1-AP        |
| Rabbit anti-FGFBP1                   | Proteintech; 25006-1-AP        |
| Rabbit anti-EGR1                     | Cell Signal Technology; 4154s  |
| Rabbit anti-Ki67                     | Servicebio; GB111141           |
| Rabbit anti-PCNA                     | Servicebio; GB11010            |
| Rabbit anti-p-FGFR1(phospho Y654)    | Abcam; ab59194                 |
| Rabbit anti-FGF2                     | Beyotime; AF6891               |
| Rabbit anti-Cleaved-PARP             | Cell Signal Technology;94885S  |
| anti-mouse IgG, HRP-linked Antibody  | Cell Signal Technology; 2624S  |
| anti-rabbit IgG, HRP-linked Antibody | Cell Signal Technology; 3670S  |
| anti-goat IgG, HRP-linked Antibody   | Servicebio; GB23204            |
| anti-sheep IgG, HRP-linked Antibody  | Abcam; ab6900                  |
| iF488-Tyramide                       | Servicebio; G1231              |
| iF555-Tyramide                       | Servicebio; G1233              |
| iF647-Tyramide                       | Servicebio; G1232              |
| Alexa Fluor® 488 Goat anti-Rabbit    | Invitrogen; A-11035            |

**Supplemental Table 8.** List of primer sequences for the RT-qPCR assay.

| Gene          | Forward primer            | Reverse primer           |
|---------------|---------------------------|--------------------------|
| <i>CDH1</i>   | TCTCTCACGCTGTGTCATCC      | CACTGGATTTGTGGTGACGA     |
| <i>CDH2</i>   | AGGCGTCTGTAGAGGCTTCTGG    | TCTGCTGACTCCTTCACTGACTCC |
| <i>VIM</i>    | GTCCGTGTCCTCGTCCTCCTAC    | AGTTGGCGAAGCGGTCATTTCAG  |
| <i>FAP</i>    | TACCCAAAGGCTGGAGCTAA      | ACAGGACCGAAACATTCTGG     |
| <i>FGFBP1</i> | TCTGGGCAACACCCAGAT        | GGCATGAGGTTGGATTGC       |
| <i>SNAI1</i>  | CCTGGTCAAGAAGCATTTC AACGC | GGAGGAGGTGTCAGATGGAGGAG  |
| <i>FGF1</i>   | ACAGCCCTGACCGAGAAGTT      | CCGTTGCTACAGTAGAGGAGT    |
| <i>FGF2</i>   | AGAAGAGCGACCCTCACATCA     | CGGTTAGCACACACTCCTTTG    |
| <i>FGF7</i>   | TCCTGCCAACTTTGCTCTACA     | CAGGGCTGGAACAGTTCACAT    |
| <i>FGF10</i>  | CAGTAGAAATCGGAGTTGTTGCC   | TGAGCCATAGAGTTTCCCCTTC   |
| <i>FGF21</i>  | GCCTTGAAGCCGGGAGTTATT     | GTGGAGCGATCCATACAGGG     |
| <i>FGFR1</i>  | GGCTACAAGGTCCGTTATGCC     | GATGCTGCCGTACTCATTCTC    |
| <i>FGFR2</i>  | GGTGGCTGAAAAACGGGAAG      | AGATGGGACCACACTTTCCATA   |



|                  |                         |                          |
|------------------|-------------------------|--------------------------|
| <i>FGFR3</i>     | CCCAAATGGGAGCTGTCTCG    | CCCGGTCCTTGTCAATGCC      |
| <i>FGFR4</i>     | GAGGGGCCGCCTAGAGATT     | CAGGACGATCATGGAGCCT      |
| <i>IL1B</i>      | CCACAGACCTTCCAGGAGAATG  | GTGCAGTTCAGTGATCGTACAGG  |
| <i>IL33</i>      | GCCTGTCAACAGCAGTCTACTG  | TGTGCTTAGAGAAGCAAGATACTC |
| <i>CSF2</i>      | GGAGCATGTGAATGCCATCCAG  | CTGGAGGTCAAACATTTCTGAGAT |
| <i>IL-18</i>     | GATAGCCAGCCTAGAGGTATGG  | CCTTGATGTTATCAGGAGGATTCA |
| <i>CXCL5</i>     | CAGACCACGCAAGGAGTTCATC  | TTCCTTCCCGTTCTTCAGGGAG   |
| <i>EGR1</i>      | AGCAGCACCTTCAACCCTCAGG  | GAGTGGTTTGGCTGGGGTAACT   |
| <i>ACTB</i>      | TCTTCCAGCCTTCCTTCTCG    | CCTGCTTGCTGATCCACATC     |
| <i>C4B</i>       | AGATGCGGTGTCCAAGGTTCTG  | GTTGCCAGGTATTTCCAAGGTCC  |
| <i>HSP90AB4P</i> | GGAAGACCACTTGGCAGTCAAG  | CAAAGCCGACATACTCTGGCATC  |
| <i>SERPIN1</i>   | AGCTCAGCATGGTCATCCTGCT  | CGAGATTCTCAGGTTTAGTCCAC  |
| <i>IGFBP6</i>    | CACAGGATGTGAACCGCAGAGA  | CACTGAGTCCAGATGTCTACGG   |
| <i>PLCH1</i>     | CTTTGGTTCGGTTCCTTGTGTGG | CTTTGGTTCGGTTCCTTGTGTGG  |
| <i>GAL</i>       | TCAGGTATGGACCTGTCAAAGCT | TGGCAACCACAGGTCAATCAGC   |
| <i>TMSB10</i>    | TGGCAGACAAACCAGACATGG   | CGAAGAGGACGGGGGTAGG      |

**Supplemental Table 9.** List of antibodies for the Western blotting and ChIP assays.

| <b>Antibodies</b>                    | <b>Supplier; catalogue number</b> |
|--------------------------------------|-----------------------------------|
| Sheep anti-FAP $\alpha$              | R&D System; AF3715                |
| Mouse anti- $\beta$ -actin           | Cell Signal Technology; 3700S     |
| Mouse anti-E-Cadherin                | Cell Signal Technology; 14472S    |
| Rabbit anti-N-Cadherin               | Cell Signal Technology; 4061S     |
| Mouse anti-Vimentin                  | Abcam; ab8978                     |
| Rabbit anti-Snail                    | Abcam; ab180714                   |
| Rabbit anti-FGFBP1                   | Proteintech;25006-1-AP            |
| Rabbit anti-FGFR1                    | Cell Signal Technology; 9740s     |
| Rabbit anti-p-FGFR1(phospho Y654)    | Abcam; ab59194                    |
| Rabbit anti-FGF2                     | Beyotime; AF6891                  |
| Rabbit anti-EGR1                     | Cell Signal Technology; 4154s     |
| Rabbit anti-Erk1/2                   | Cell Signal Technology; 4695s     |
| Rabbit anti-p-Erk1/2 (Thr202/Tyr204) | Cell Signal Technology; 4370s     |
| Rabbit anti-HIF1 $\alpha$            | Cell Signal Technology; 36169s    |

|                                      |                               |
|--------------------------------------|-------------------------------|
| anti-mouse IgG, HRP-linked Antibody  | Cell Signal Technology; 2624s |
| anti-rabbit IgG, HRP-linked Antibody | Cell Signal Technology; 5127s |
| anti-sheep IgG, HRP-linked Antibody  | Abcam; ab6900                 |
| anti-Rabbit IgG                      | Cell Signal Technology; 2729s |

---

**Supplemental Table 10.** List of primer sequences for the ChIP-qPCR assay.

| <b>Gene promoter</b> | <b>Forward primer</b> | <b>Reverse primer</b> |
|----------------------|-----------------------|-----------------------|
| <i>FAP</i>           | AGCACACCTTGGATATTACTC | ATGAGTCATTAGGCACTTAC  |
| <i>FGFBP1</i>        | GCCAGGAACTCTACCATAGGT | TTGGTGGTAAGGTTACAGGT  |

**Full unedited gel for Figure 3I**

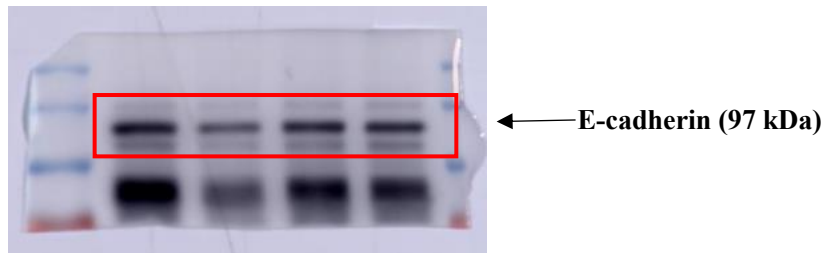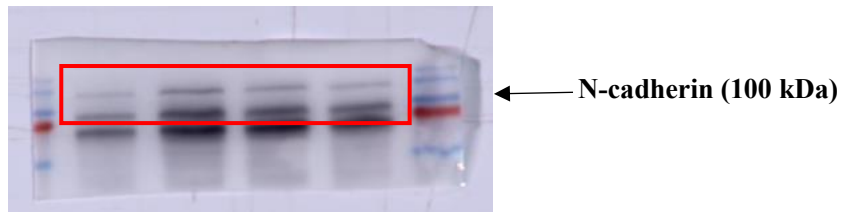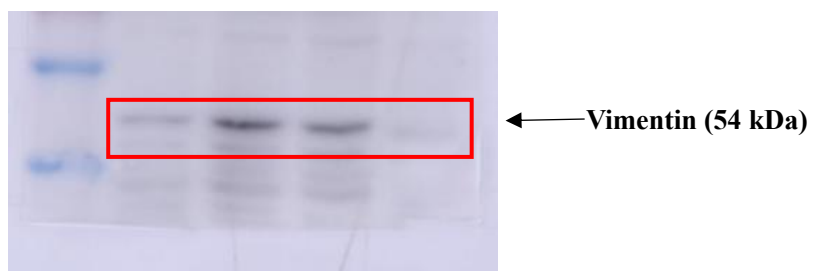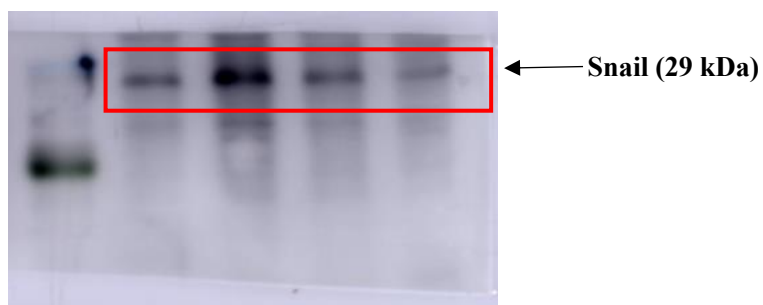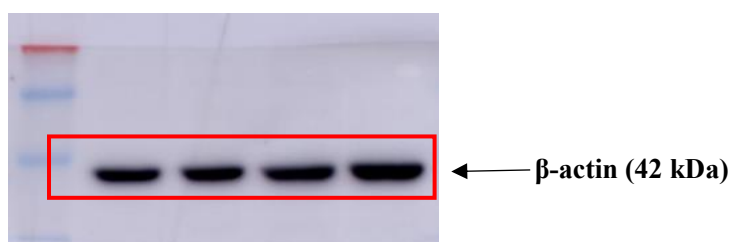

**Full unedited gel for Figure 4C**

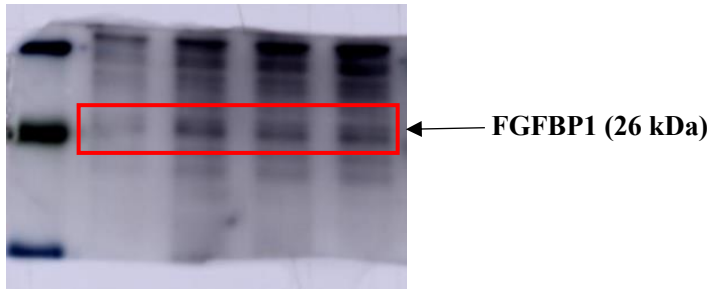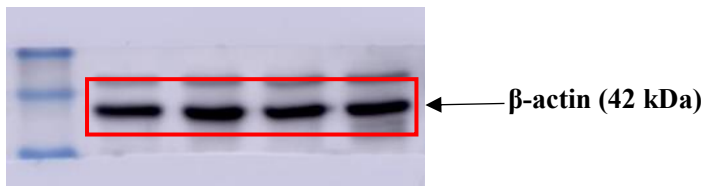

## Full unedited gel for Figure 5A

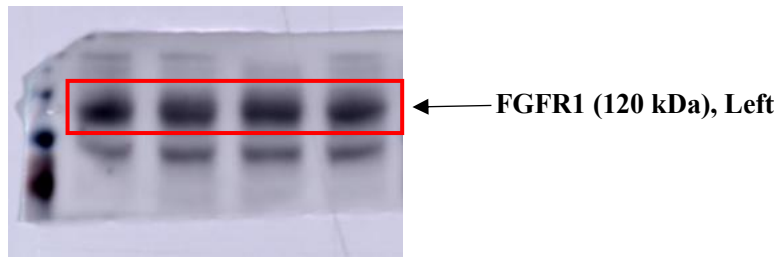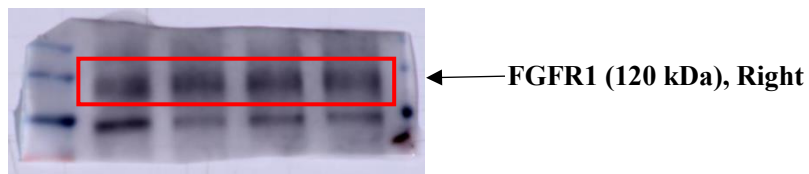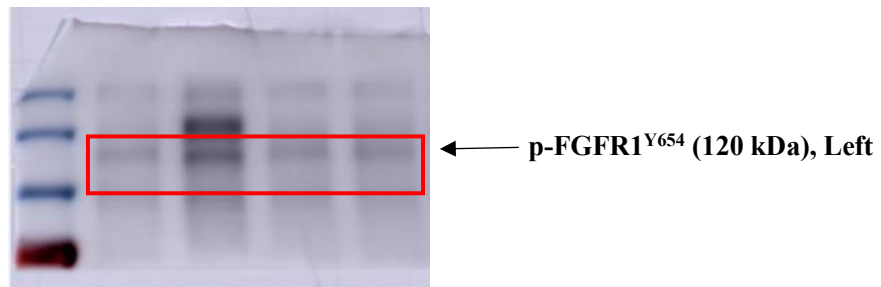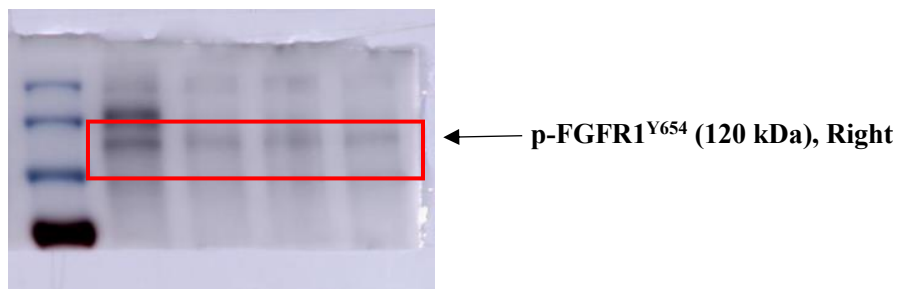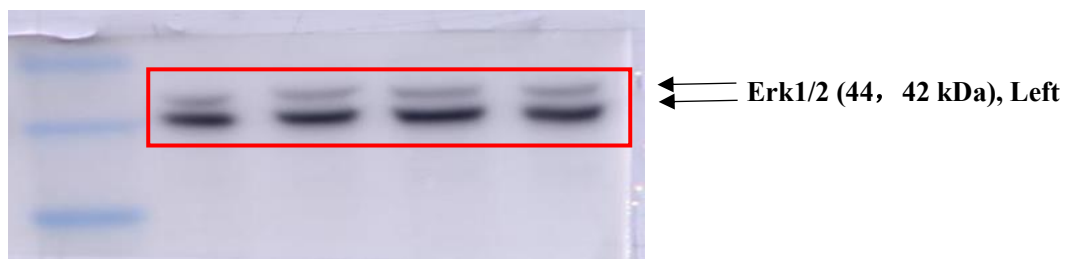

**Full unedited gel for Figure 5A**

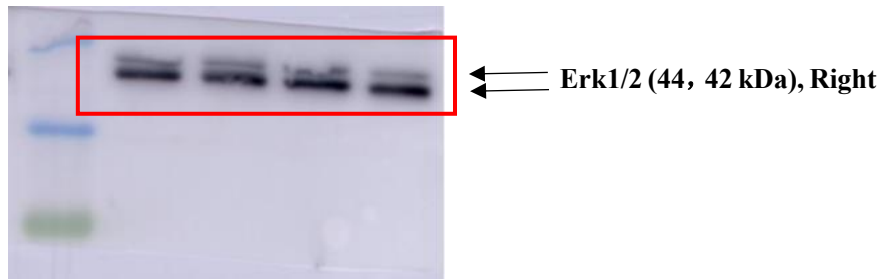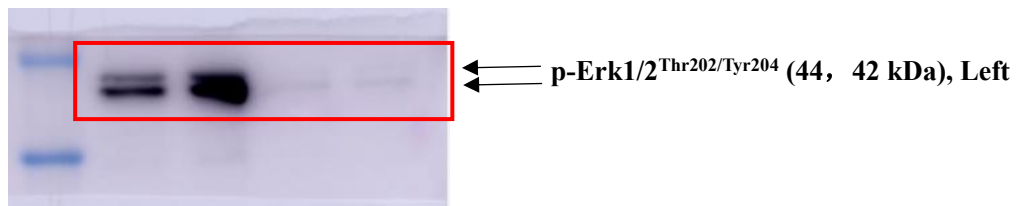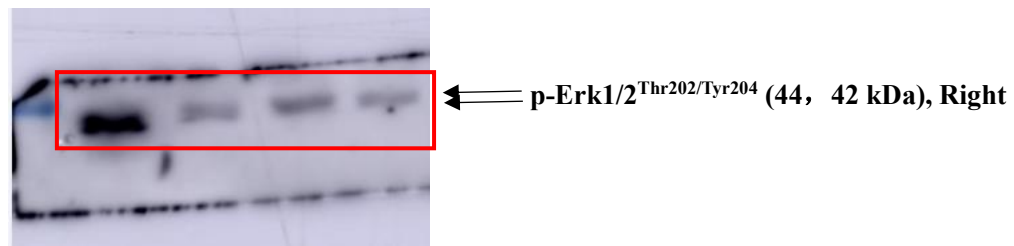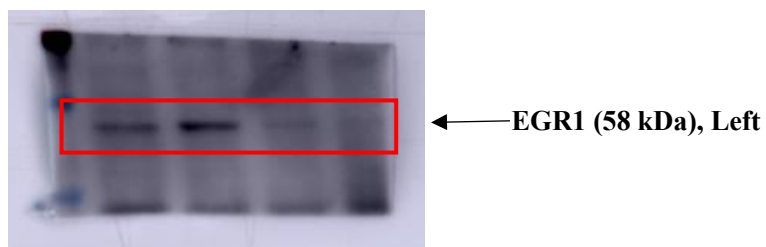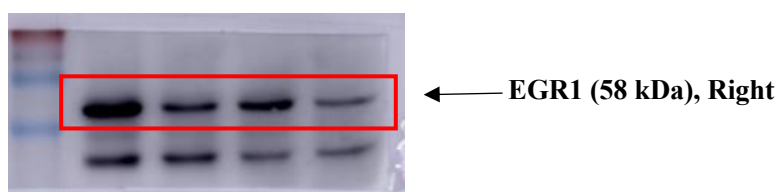

## Full unedited gel for Figure 5A

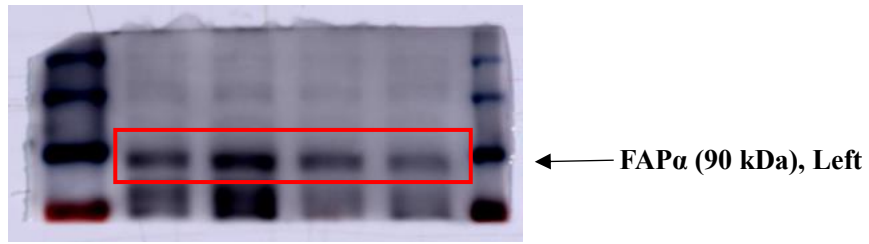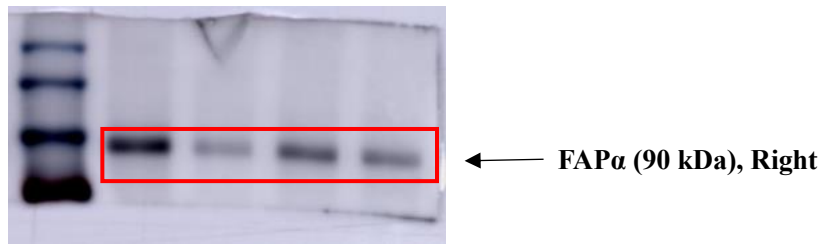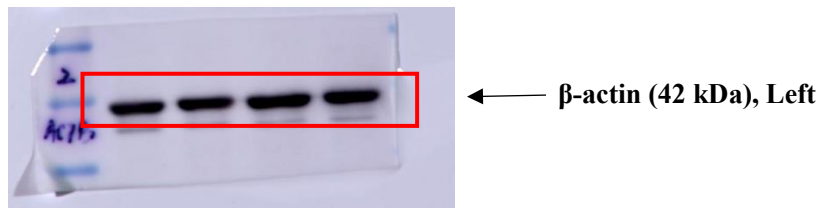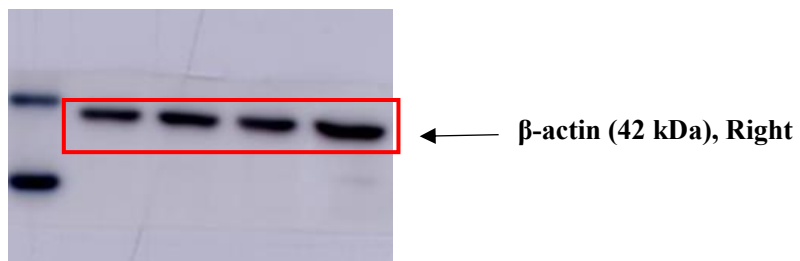

**Full unedited gel for Figure 5B**

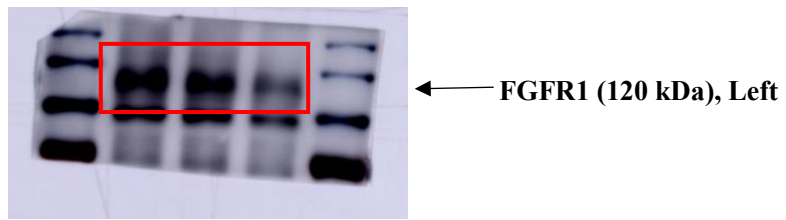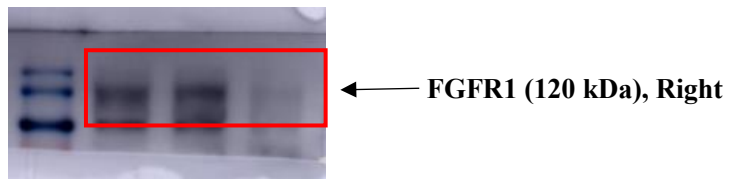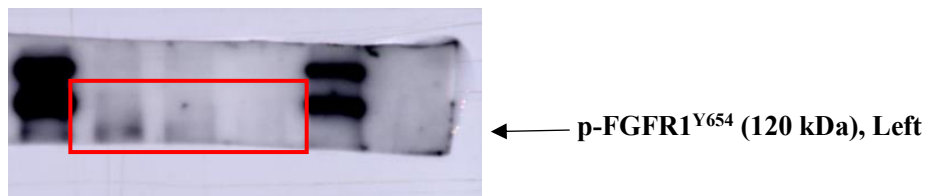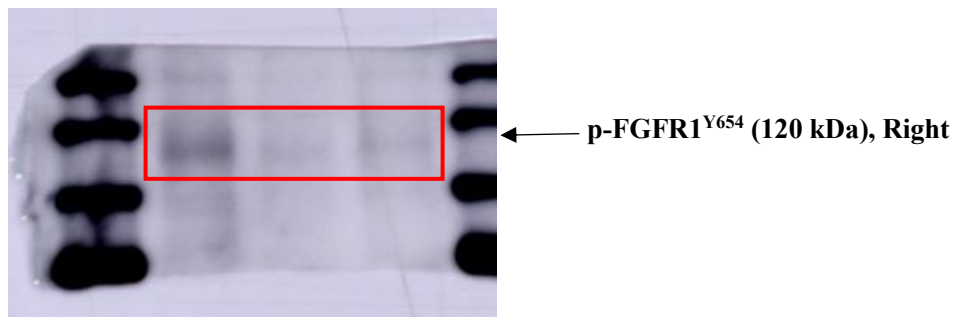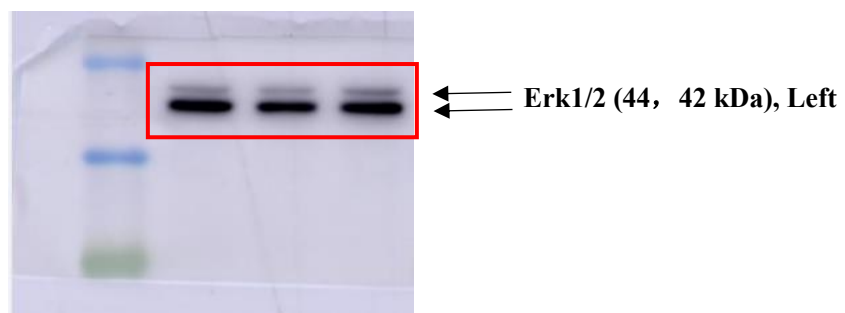



## Full unedited gel for Figure 5B

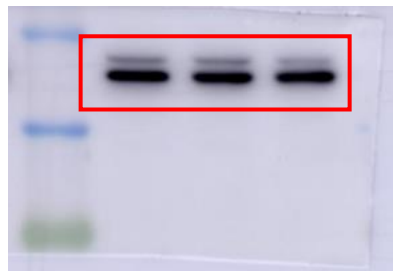

←← Erk1/2 (44, 42 kDa), Right

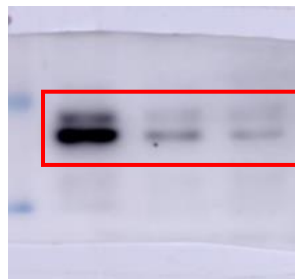

←← p-Erk1/2<sup>Thr202/Tyr204</sup> (44, 42 kDa), Left

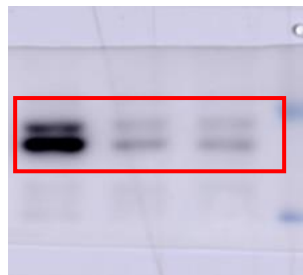

←← p-Erk1/2<sup>Thr202/Tyr204</sup> (44, 42 kDa), Right

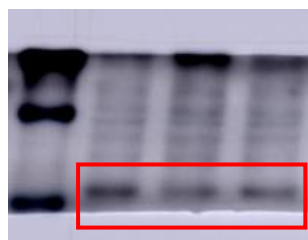

← EGR1 (58 kDa), Left

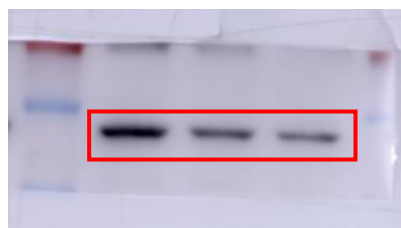

← EGR1 (58 kDa), Right

## Full unedited gel for Figure 5B

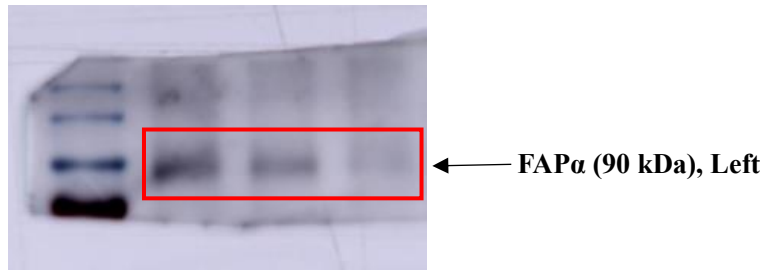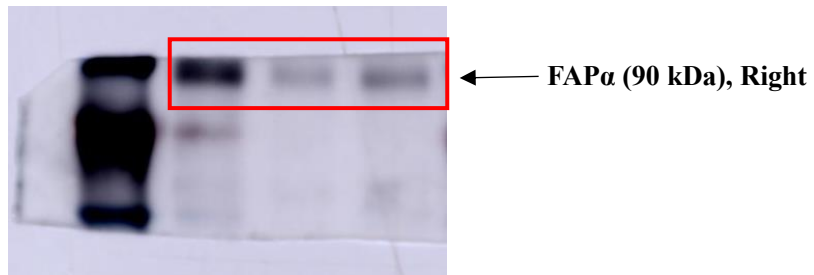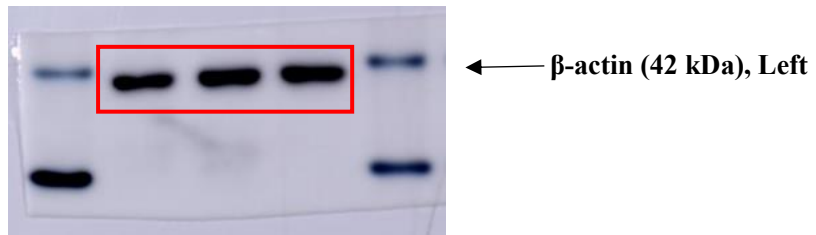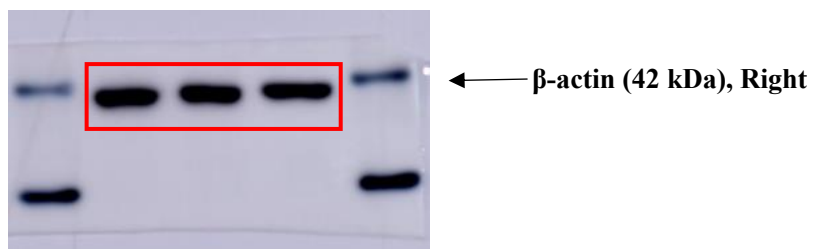

## Full unedited gel for Figure 5C

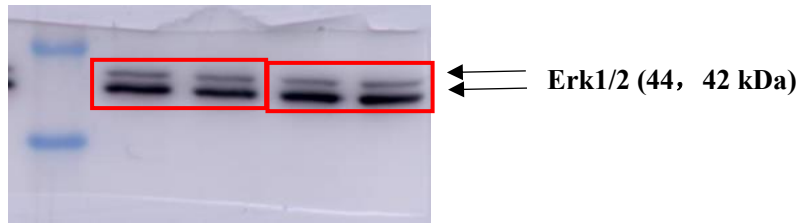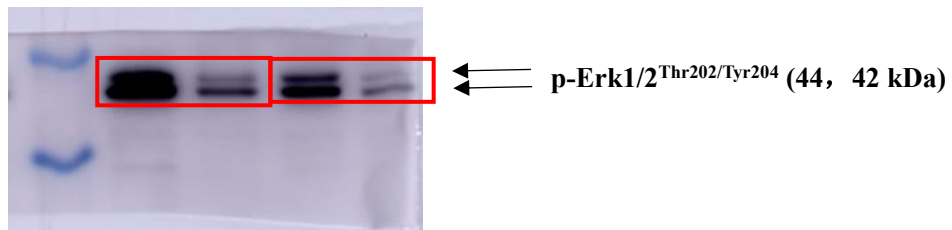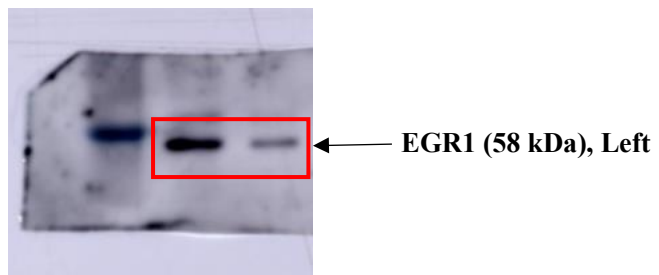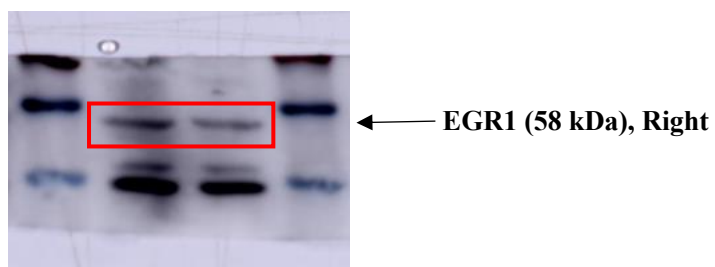

## Full unedited gel for Figure 5C

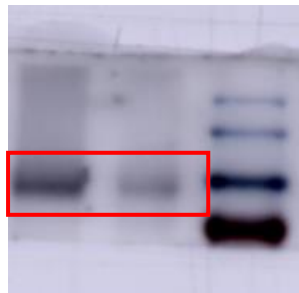

← FAP $\alpha$  (90 kDa), Left

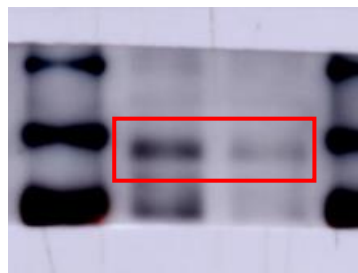

← FAP $\alpha$  (90 kDa), Right

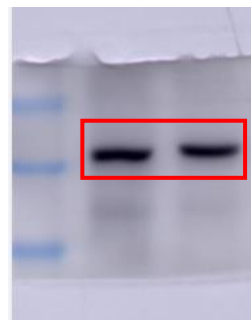

←  $\beta$ -actin (42 kDa), Left

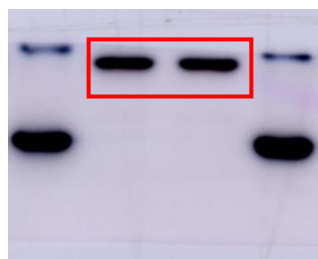

←  $\beta$ -actin (42 kDa), Right

## Full unedited gel for Figure 5D

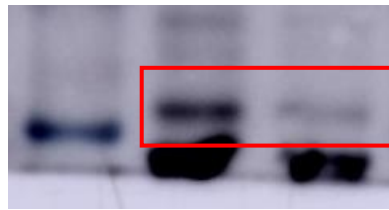

← EGR1 (58 kDa), Left

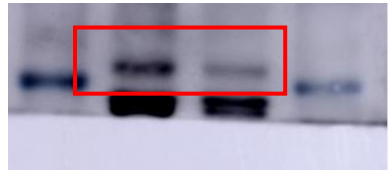

← EGR1 (58 kDa), Right

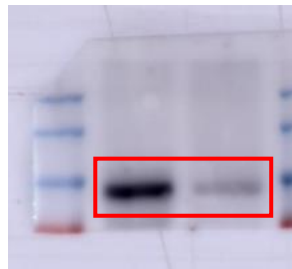

← FAP $\alpha$  (90 kDa), Left

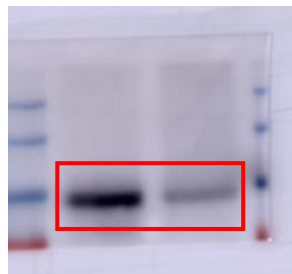

← FAP $\alpha$  (90 kDa), Right

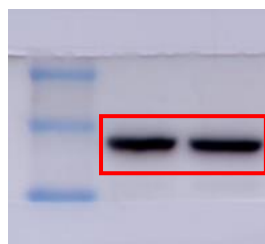

←  $\beta$ -actin (42 kDa), Left

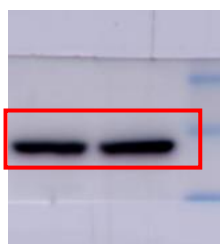

←  $\beta$ -actin (42 kDa), Right

**Full unedited gel for Figure 6J**

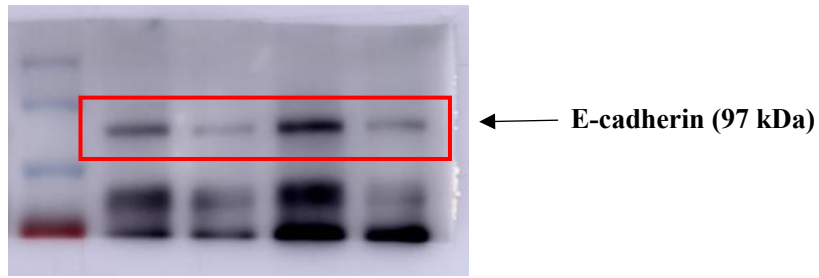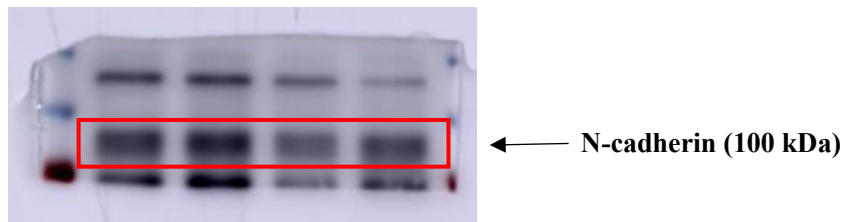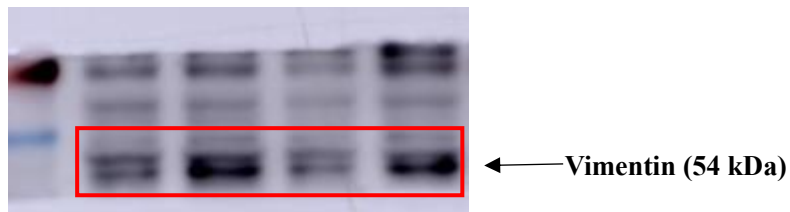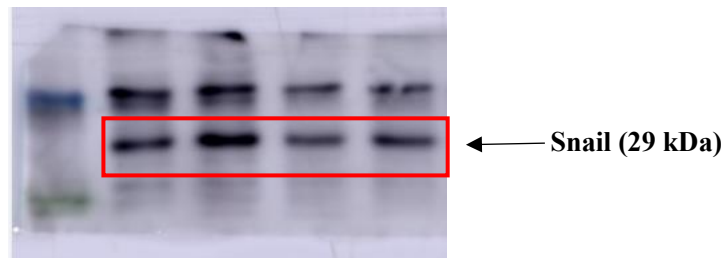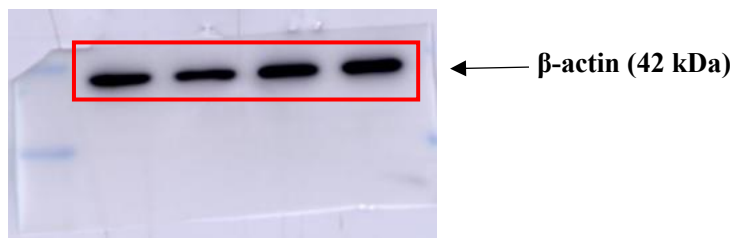

**Full unedited gel for Supplemental Figure 3B**

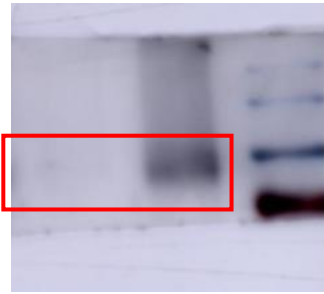

← **FAPα (90 kDa)**

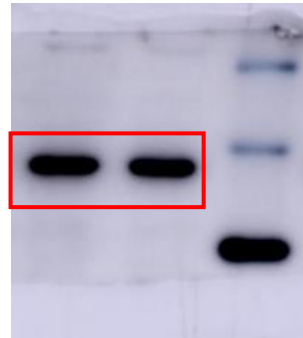

← **β-actin (42 kDa)**

**Full unedited gel for Supplemental Figure 4E**

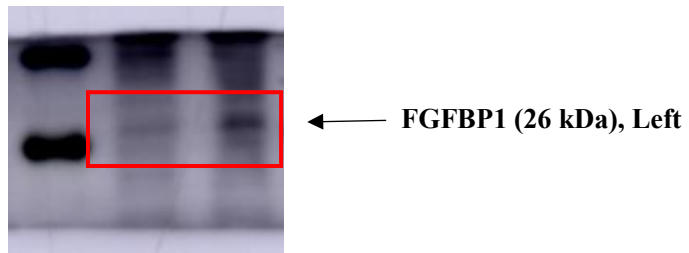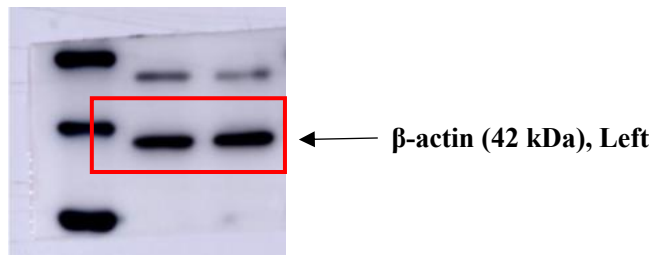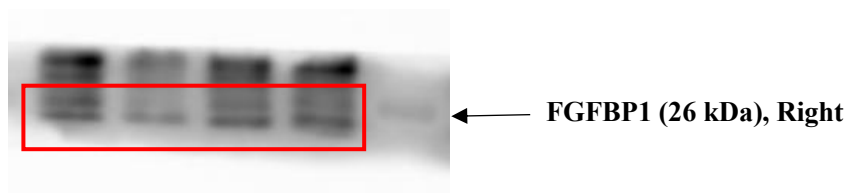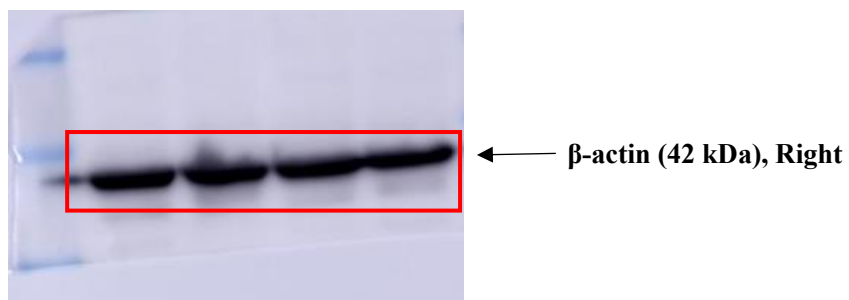



**Full unedited gel for Supplemental Figure 7A**

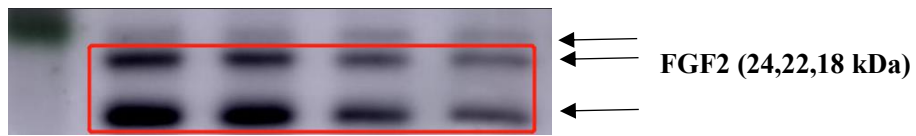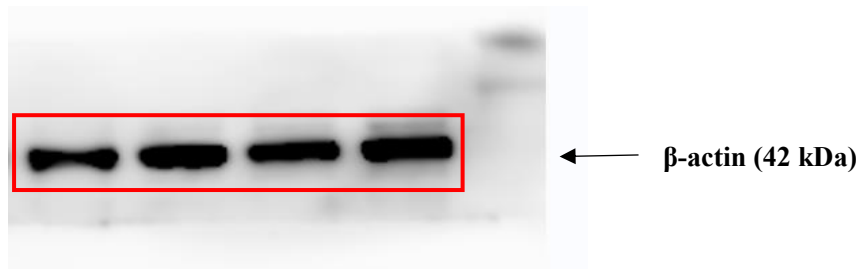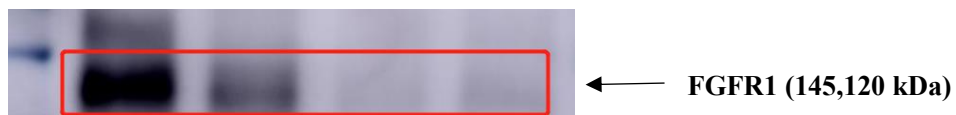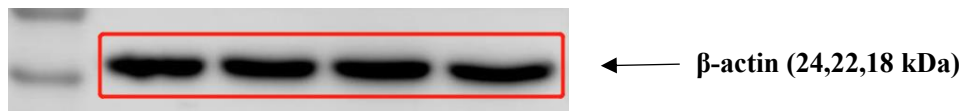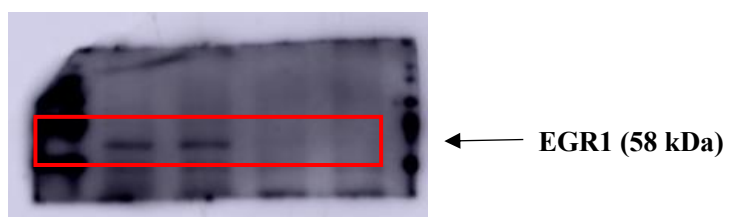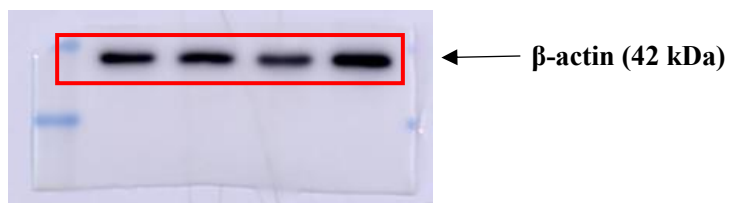

**Full unedited gel for Supplemental Figure 11A**

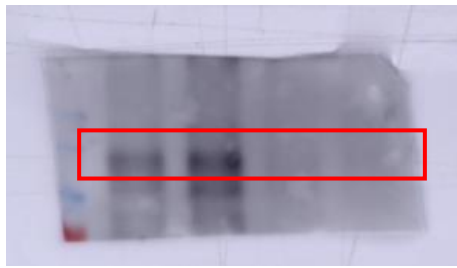

← FGFR1 (120 kDa)

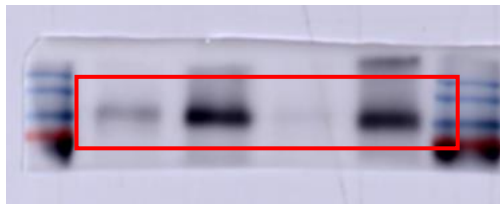

← FAP $\alpha$  (90 kDa)

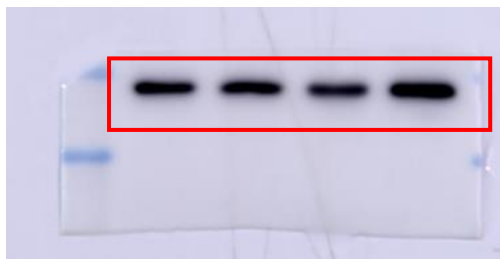

←  $\beta$ -actin (42 kDa)

**Full unedited gel for Supplemental Figure 14C**

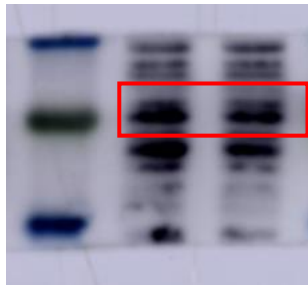

← FGFBP1 (26 kDa)

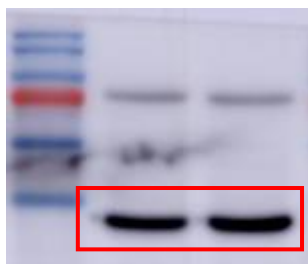

←  $\beta$ -actin (45 kDa)

## Full unedited gel for Supplemental Figure 14D

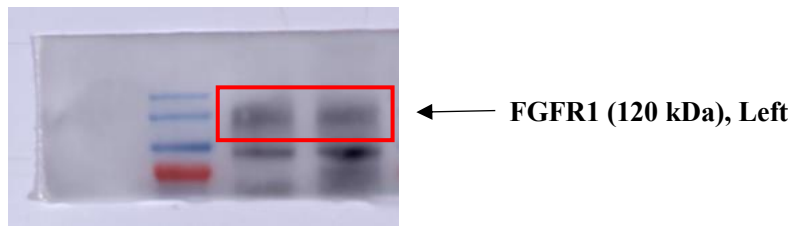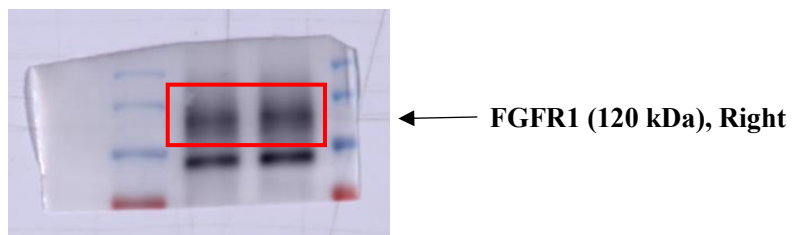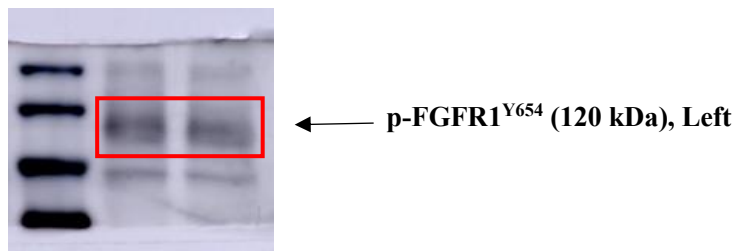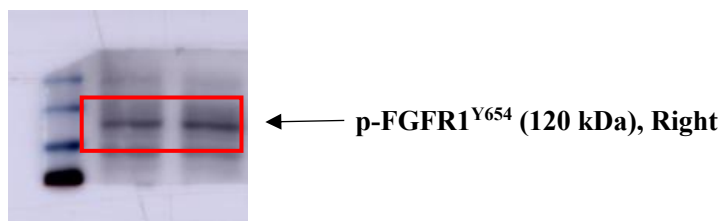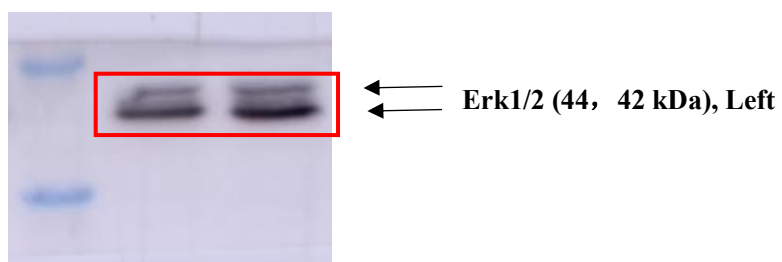

## Full unedited gel for Supplemental Figure 14D

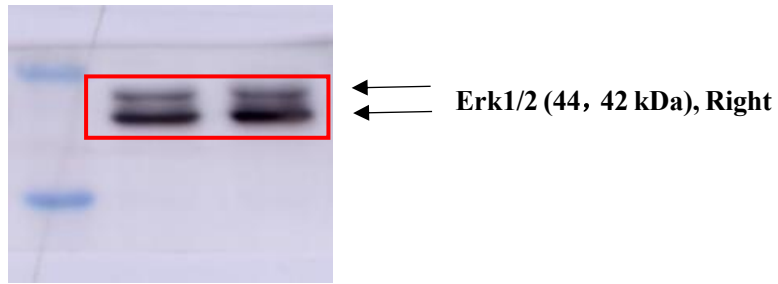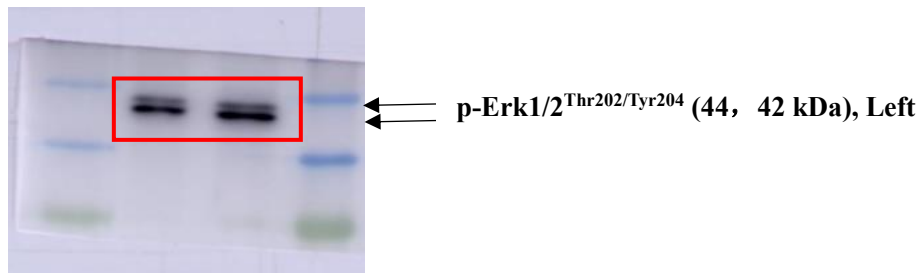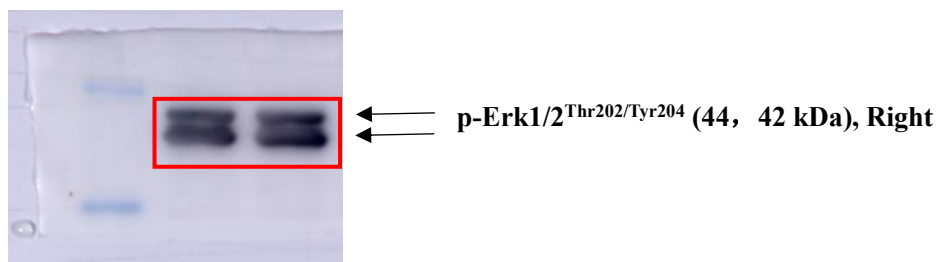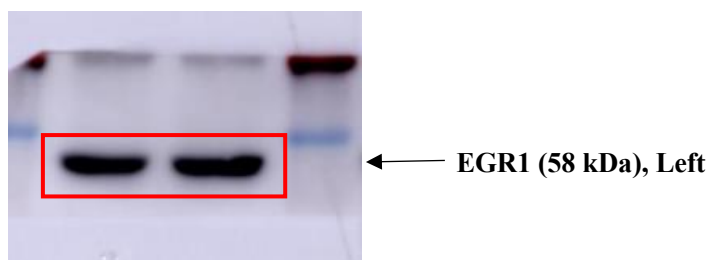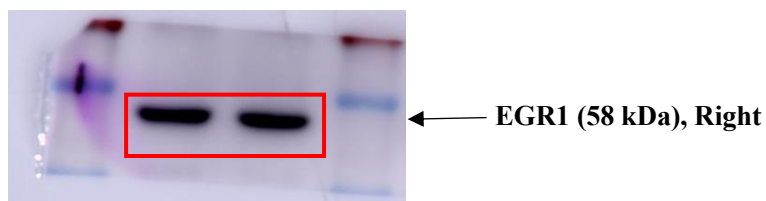

**Full unedited gel for Supplemental Figure 14D**

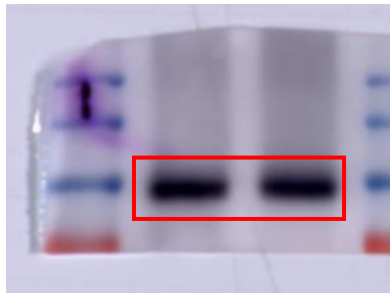

← **FAP $\alpha$  (90 kDa), Left**

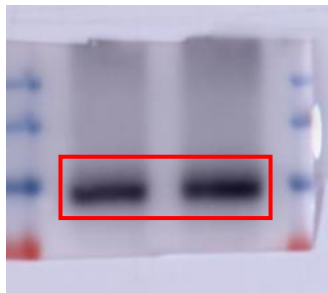

← **FAP $\alpha$  (90 kDa), Right**

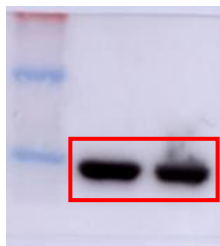

←  **$\beta$ -actin (42 kDa), Left**

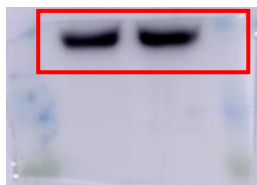

←  **$\beta$ -actin (42 kDa), Right**

**Full unedited gel for Supplemental Figure 15B**

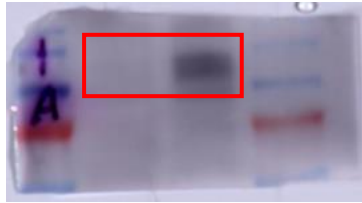

← HIF-1 $\alpha$  (120 kDa)

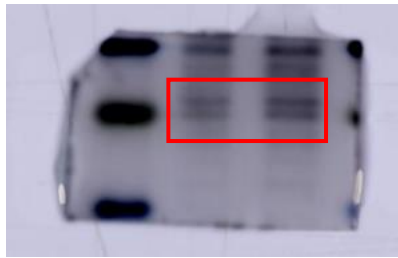

← FGFBP1 (26 kDa)

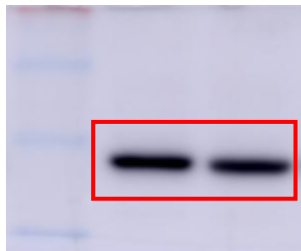

←  $\beta$ -actin (42 kDa)

**Full unedited gel for Supplemental Figure 15C**

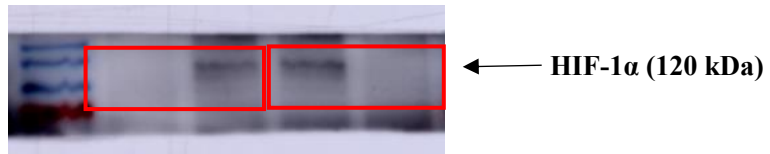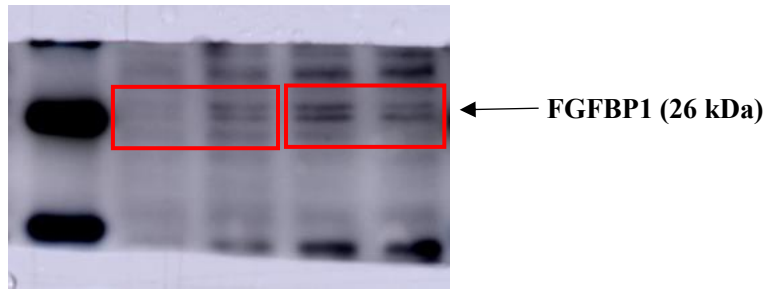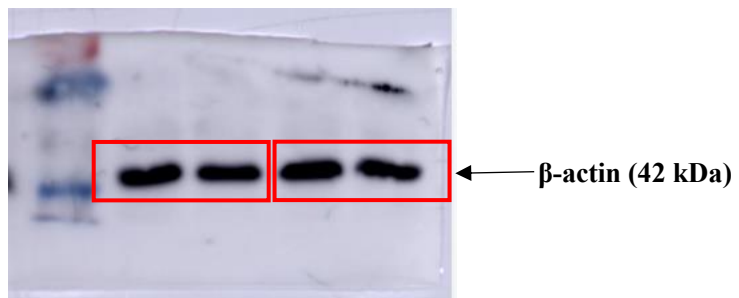

Supplement: jci-132-157399-s067.pdf [file jci-132-157399-s067.pdf]
